# 1 Individual-Based Network Model for Rift Valley Fever in 2 Kabale District, Uganda, to Guide Mitigation Measures: A One 3 Health Model

4  
5 Musa Sekamatte <sup>1</sup>, Mahbulul H. Riad<sup>2\*</sup>, Tesfaalem Tekleghiorghis<sup>3</sup>, Kenneth J. Linthicum<sup>4</sup>, Seth C. Britch<sup>4</sup>,  
6 Juergen A. Richt<sup>3</sup>, J. P. Gonzalez<sup>3</sup>, and Caterina M Scoglio<sup>2</sup>

7  
8  
9 <sup>1</sup>Zoonotic Disease Coordination Office (ZDCO), National One Health Platform (NOHP); Ministry of Health:  
10 Plot 1 Lourdel Road, 4th Floor Lourdel Towers, Nakasero - Kampala, Uganda

11 <sup>2</sup>Department of Electrical and Computer Engineering, College of Engineering, Kansas State University,  
12 Manhattan, KS, 66502, USA

13 <sup>3</sup>CEEZAD, Department of Diagnostic Medicine/Pathobiology, College of Veterinary Medicine, Kansas State  
14 University, Manhattan, KS, 66506, USA

15 <sup>4</sup>USDA-Agricultural Research Service Center for Medical, Agricultural, and Veterinary Entomology,  
16 Gainesville, FL, 32608, USA

17  
18 Corresponding Author:

19 E-mail: [mahbubriad@ksu.edu](mailto:mahbubriad@ksu.edu)  
20  
21  
22

## 23 **Abstract**

24 Rift Valley fever (RVF) is a zoonotic disease which causes significant morbidity and mortality among ungulate  
25 livestock and humans in endemic regions. In the major RVF epizootic regions of East Africa, the causative  
26 agent of the disease, Rift Valley fever virus (RVFV), is primarily transmitted by multiple mosquito species in  
27 *Aedes*, *Culex*, and *Mansonia* genera during both epizootic and enzootic periods in a complex transmission cycle  
28 largely driven by the environment. However, recent RVFV activity in Uganda demonstrated that RVFV could  
29 also spread into new regions through livestock movements, and underscored the need to develop effective  
30 mitigation strategies to reduce transmission and prevent spread among cattle operations. We simulated RVFV  
31 transmission among cattle in different sub counties of Kabale District in Uganda using real world livestock data  
32 in a network-based model. This model considered livestock as spatially explicit factors in different sub-counties  
33 subjected to specific vector mosquito and environmental factors, and was configured to investigate and  
34 quantitatively evaluate the relative impacts of mosquito control, livestock movement regulations, and diversity  
35 in cattle populations on the spread of the RVF epizootic. We concluded that cattle movement should be  
36 restricted during periods of high vector mosquito abundance to control the epizootic spreading among sub-  
37 counties. On the other hand we found that mosquito control would only be sufficient to control the epizootic  
38 when mosquito abundance was low. Importantly, simulation results also showed that cattle populations with a  
39 higher diversity with regard to indigenous combined with exotic breeds led to reduced numbers of infected  
40 cattle compared to more homogenous cattle populations.

## 41 **Introduction**

42 Rift Valley fever (RVF) is a zoonotic mosquito-borne disease caused by Rift Valley fever virus (RVFV;  
43 *Phlebovirus*: Bunyaviridae) that severely affects ungulate livestock and wildlife but can also affect humans in  
44 RVF-endemic regions of sub-Saharan Africa and parts of the Arabian Peninsula [1, 2]. The potential extreme  
45 economic, and public and veterinary health burdens of epizootics/epidemics of RVF have been described  
46 extensively [3]. Heavy rainfall and flooding are the most prominent precursors of RVF epizootics in savanna  
47 areas of Africa, due to flooded ground pools stimulating massive emergence of transovarially RVFV-infected  
48 *Aedes* mosquitoes and the initiation of the transmission cycle as the virus is introduced into livestock by these

49 mosquitoes during blood feeding [2, 4, 5]. However, areas outside the recognized RVF epizootic regions,  
50 especially in central Africa, may not experience transmissions linked to elevated rainfall [6]. In these areas,  
51 RVFV is most likely spread via movements of infected livestock from endemic areas with elevated rainfall:  
52 livestock trading across different market areas may include infectious cattle that could disperse the virus and,  
53 in the presence of suitable mosquito vectors, accelerate and expand the transmission of RVFV, especially when  
54 cattle operations are distributed across large distances but linked by trade [7]. Patterns of recent RVF activity in  
55 Uganda first described on 9 March 2016 support this hypothesis of RVFV spread linked to the cattle trade [8]  
56 and underscore the need to develop effective operational surveillance and mitigation strategies to reduce  
57 transmission and prevent spread among cattle operations. In this study we designed a network-based epidemic  
58 transmission model to run simulations to quantitatively investigate the patterns of spread of RVFV across cattle  
59 operations in Kabale District, Uganda, providing an opportunity to thus quantitatively investigate the potential  
60 impact of various mitigation methods.

61 Scoglio et al. [9] recently published an individual-level RVF epidemic transmission model for cattle in Riley  
62 County, Kansas, USA, structured on the *susceptible-exposed-infected-recovered* (SEIR) framework applied to  
63 a cattle movement network. They used two separate kernel functions – exponential and power-law models – to  
64 model cattle movement between and among farms in Riley County. Simulations with these kernel functions  
65 revealed that more widespread epizootics resulted from the power law model, most likely because cattle were  
66 allowed to move to distant farms. In contrast, the exponential model greatly restricted cattle movement to more  
67 proximal farms, reducing spread of the virus. The message from the Scoglio et al. study is that restricting cattle  
68 movement substantially reduces RVFV transmission and spread across the landscape of cattle operations.  
69 Secondly, they found that partitioning each farm into several clusters also results in less widespread RVF  
70 epizootics.

71 In the present study, we built upon the Scoglio et al. [9] model to investigate RVFV epidemiology in Kabale  
72 District using real world livestock data. This model considered livestock as spatially explicit factors in an  
73 individual-based network representing different sub-counties subjected to specific mosquito and environmental  
74 factors. We designed the cattle movement network based on the local trading system for the Kabale District,  
75 but considered two different networks depending upon the relative susceptibility of exotic and indigenous cattle.

76 Mosquito vectors for RVFV were included in an aggregated way with a parameter for transmission rate from  
77 an infectious animal to a susceptible one, which included mosquito abundance, survival rate, vector  
78 competence, and feeding patterns – collectively proportional to vectorial capacity, the efficiency of vector borne  
79 disease transmission [9]. Simulations were performed for a variety of initial outbreak conditions, such as single  
80 location versus multi-location initial outbreaks, as well as outbreaks in locations with varying cattle populations,  
81 mosquito transmission rates, and different cattle movement probabilities among sub-counties. We configured  
82 the model to investigate and quantitatively evaluate the relative impacts of mosquito control, livestock  
83 movement regulations, and diversity – that is, whether cattle are indigenous or exotic breeds – in cattle  
84 populations on containing the spread of the RVF epizootic. Materials and Methods

## 85 **Modeling Framework**

86 A simplified diagram of the individual-based network modeling framework we used to model RVFV  
87 epidemiology in Kabale District, Uganda, is presented in **Fig. 1**. Our RVFV modeling framework consists of  
88 two parts, a node transition graph and a contact network. The node transition graph consists of four  
89 compartments— Susceptible ( $S$ ), Exposed ( $E$ ), Infectious ( $I$ ), and Recovered ( $R$ ). Once a susceptible cow gets  
90 bitten by a RVFV-infected mosquito (exposed), there is a possibility that after a certain period of viral  
91 replication, the cow itself becomes infectious. The infectious cow can in turn infect susceptible naïve  
92 mosquitoes who bite it during the period before the cow recovers or is removed, for example by death or culling.  
93 Each individual cow can be in only one of these four compartments and rates of transitions between  
94 compartments are driven by parameters  $\beta$  (transmission rate),  $\delta$  (extrinsic incubation period of the virus), and  $\gamma$   
95 (recovery rate) in **Fig. 1**. The contact network consists of the total population size ( $N$ ) of cows in the network,  
96 each represented by a small square, or node, and a black line links two nodes when an opportunity for  
97 transmission of RVFV between two cows (via the bite of an infectious mosquito) arises.

98 **Fig. 1: Simplified diagram of an individual-based network model which consists of a node transition graph and a**  
99 **contact network. Circles in the node transition graph represent the four compartments** Susceptible ( $S$ ), Exposed ( $E$ ),  
100 Infectious ( $I$ ), and Recovered ( $R$ ) of a node (i.e., of an individual cow), and **arrows between the compartments show the**  
101 **direction of transition for each node (cow)** with rates driven by parameters  $\beta$  (transmission rate),  $\delta$  (extrinsic incubation  
102 period of the virus), and  $\gamma$  (recovery rate). **Circles in the contact network in turn represent individual cows (i.e., nodes),**  
103 **and black lines linking circles represent opportunities for RVFV transmission.**

## 104 Geographic Structure and Movement in the Cattle Contact Network

105 The cattle contact network consisted of 20,806 cattle ( $N$ ) unevenly distributed across 19 sub-counties in the  
 106 Kabale District of Uganda (**Table 1** and **Fig. 2**), which is approximately 1,679 km<sup>2</sup> (648 sq mi) with a human  
 107 population of nearly half a million in the western region of Uganda. We obtained these cattle abundance data,  
 108 as well as the proportions of indigenous and exotic cows in each sub-district. From the Uganda Bureau of  
 109 Statistics (UBOS) [10].

110 **Table 1: Cattle in different sub-counties in Kabale District. This data set was derived from UBOS Statistical Report**  
 111 **012, Kabale District [10]**

| Sub-county          | Exotic cattle | Indigenous    | Total no.     | Latitude  | Longitude |
|---------------------|---------------|---------------|---------------|-----------|-----------|
| Kabale Municipality | 336           | 600           | 936           | -1.242718 | 29.9878   |
| Buhara              | 215           | 837           | 1052          | -1.360408 | 30.033545 |
| Kaharo              | 87            | 578           | 665           | -1.168568 | 30.129104 |
| Kamuganguzi         | 367           | 526           | 893           | -1.351767 | 30.007095 |
| Kitumba             | 187           | 692           | 879           | -1.298281 | 29.994179 |
| Kyanamira           | 361           | 719           | 1080          | -1.258257 | 30.010411 |
| Maziba              | 141           | 427           | 568           | -1.320095 | 30.078319 |
| Rubaya              | 180           | 1,008         | 1188          | -1.461613 | 29.936789 |
| Bubale              | 1,721         | 1580          | 3301          | -1.209926 | 29.935529 |
| Bufundi             | 74            | 804           | 878           | -1.323263 | 29.863567 |
| Hamurwa             | 267           | 1,083         | 1350          | -1.206086 | 29.933963 |
| Ikumba              | 141           | 845           | 986           | -1.109115 | 29.868211 |
| Muko                | 38            | 872           | 910           | -1.205698 | 29.813709 |
| Bukinda             | 61            | 268           | 329           | -1.201716 | 30.132474 |
| Kamwezi             | 187           | 1,623         | 1810          | -1.162148 | 30.143883 |
| Kashambya           | 68            | 721           | 789           | -1.205614 | 29.935165 |
| Rwamucucu           | 71            | 713           | 784           | -1.20972  | 30.06     |
| Hamurwa T/C         | 116           | 582           | 698           | -1.206021 | 29.933555 |
| Muhanga T/C         | 42            | 276           | 318           | -1.171253 | 30.124587 |
| Ruhija              | 8             | 382           | 390           | -1.212469 | 29.949936 |
| Butanda             | 24            | 403           | 427           | -1.32322  | 29.863589 |
| Katuna T/C          | 304           | 271           | 575           | -1.428654 | 30.013897 |
| <b>Total</b>        | <b>4,996</b>  | <b>15,810</b> | <b>20,806</b> |           |           |

112 **Fig. 2: Location of each sub-county in Kabale District. Circles represent cattle farms in each sub-county and are**  
 113 **color coded and scaled according to the total number of cattle in each location.**

114 Some sub-counties were represented by data from a municipality (Kabale) or town council (Hamurwa,  
 115 Muhanga, and Katuna) boundary (**Table 1**), and we extracted the longitude and latitude of the centroid of each  
 116 sub-county, municipality, or town council boundary from Google maps to display in a GIS as shown in **Fig. 2**.

117 To capture the realism of the Uganda cattle movement and trading system in the model, we treated contact  
118 among cattle (not physical, rather implicit contact via mosquitoes) differently depending on geographic scale:  
119 cattle were assumed to move freely within each sub-county, while their movement was restricted between sub-  
120 counties. Within a sub-county we assumed each cow had equal probability to be connected to all other  
121 individual cows in that sub-county via mosquitoes because of their close relative proximity when compared to  
122 the Kabale District as a whole. This relationship among cows within sub-counties was best represented by an  
123 Erdos-Renyi network, where each node (i.e., cow) has equal probability of connectivity to any other node [15,  
124 16].

125 Contact among cows from different sub-counties, on the other hand, called for a different kind of representation.  
126 Transmission of RVFV from one sub-county to another can happen via the movement of cattle for economic  
127 reasons, most commonly through cattle sales at local market places. Thus, contact among cows and thus the  
128 possibility of virus transfer from more proximal sub-counties was weighed higher than contact among cows  
129 and potential virus transfer from more distant sub-counties for this local trading system. We accomplished this  
130 weighting in the model with an exponential distance kernel, expressed as  $e^{-kd}$ , where  $k$  is a constant which scales  
131 the probability of cows from different sub-counties to be in contact and has a unit  $km^{-1}$ , and where  $d$  is distance  
132 between the origin and destination sub-locations.

133 We did not include the interactions of cows from different locations at market places in the transmission part  
134 of the model. Rather, we modeled the potential transmissions of RVFV that result from cows that move from  
135 their original location to another location, where they come in contact with others in that location. Therefore,  
136 an infected cow being moved to a new location can infect other cattle via local mosquitoes at the destination  
137 location; but we assumed no virus transmissions happen at the market place.

### 138 **Cattle Contact Network Visualization**

139 We visualized the 20,806 cattle across the 19 sub-districts using the network visualization software Gephi [11],  
140 but scaling cattle population sizes across the network by a factor of 1/20 for clarity. It is important to note that  
141 scaling was only used for visualization and not model simulations which were performed with the full value of  
142  $N$ . In **Fig. 3** the contact network visualization is shown where the name of the sub-counties are marked. The  
143 dense circular masses of varying size in **Fig. 3** represent the varying abundance of cattle at each sub-county

144 similar to the scaled symbols shown in **Fig. 2**. Long black lines in **Fig. 3** connect some sub-counties,  
145 representing potential connections, and thus opportunities for mosquito-mediated transmission of RVFV  
146 between cows via cattle movements. The inset in **Fig. 3** expands a small portion of the contact network showing  
147 that the dense circular masses are actually made up of small black circles, each of which represents 20 cattle  
148 and correspond to the nodes shown in the representative contact network in **Fig. 1**. Likewise, the black lines  
149 among these nodes represent possible connections within and between sub-counties in the **Fig. 3** inset.  
150 Importantly, the particular arrangement of black lines (connectivity) in this visualization only shows one set of  
151 possible connections within and between sub-counties; modeling simulations consider many arrangements.

152

153 **Fig. 3: The overall structure of the network. Dense circular groupings of black dots represent different sub-**  
154 **counties. Inset shows close-up of two such groupings and one possible arrangement of links within and between**  
155 **them.**

## 156 **RVFV Infection in Cows and Mosquitoes**

157 We explicitly modeled the progression of RVFV infection of cattle with several key time components including:  
158 time for a newly infected individual cow to become viremic enough to infect a naïve mosquito feeding on it,  
159 time that the cow remains infectious, and time for the cow to become recovered. There is a link between two  
160 cows (i.e., a line between two nodes) if (a) virus transfer is possible between them (i.e., when one is infectious  
161 and the other susceptible), and (b) if they are in physical proximity; and virus transfer ultimately happens via  
162 infected local mosquito species competent for transmission of RVFV. Thus, links connecting nodes represent  
163 possibilities of RVFV transmission from an infected cow to a susceptible cow by a mosquito. The complexity  
164 and distance of connectivity from an infectious cow to susceptible cows across the contact network depends on  
165 human-mediated movement of cows among near or distant livestock operation locations (**Fig. 3**). The  
166 connectivity from this infectious cow to other susceptible cows within its original livestock operation location  
167 depends on the size of this original location.

168 Unlike the specific modeling of the progression of RVFV in the cattle, we only implicitly modeled RVFV  
169 progression in mosquitoes via a single parameter, transmission rate ( $\beta$ ). Transmission rate is proportional to

170 realized vectorial capacity of competent mosquito species likely to be present in the study area, and includes all  
171 key time components of RVFV infection in vector mosquitoes. Vectorial capacity is an aggregated  
172 measurement of the efficiency of vector-borne disease transmission which inherently considers climate and  
173 environmental factors: the Garrett-Jones [12] equation for estimating vectorial capacity  $C$  is given as, which  
174 takes into account mosquito vector density proportional to host density ( $m$ ), daily probability of host being fed  
175 upon ( $a$ ), probability of daily survival of the vector ( $p$ ), length of the virus extrinsic incubation period in days  
176 ( $n$ ), and vector competence, or, the proportion of mosquitoes able to transmit RVFV ( $b$ ) [9, 12].

177 In our model we estimated a composite index of vectorial capacity across indigenous mosquito species that  
178 takes into account survival and population density and can be estimated by real world data. If non-infected  
179 competent mosquito vectors are present and feed on newly arrived infectious cows, a fraction of these  
180 mosquitoes, proportional to vectorial capacity will become infected with RVFV, become infectious, and  
181 transmit the virus to immunologically naïve cows during subsequent blood feeding [9].

182 Our model does not account for heterogeneity of mosquito population distribution – for instance greater  
183 proximity of some livestock operations to immature habitat of RVFV mosquito vectors – and assumes all  
184 livestock operations are equally exposed to mosquitoes. On the other hand, the variation in mosquito  
185 transmission rates included in the model provides an aspect of heterogeneity in realized exposure to vector  
186 mosquitoes.

## 187 **Spread of RVFV Infection**

188 In the network model, the infection can spread if a susceptible node (i.e., a susceptible cow) is in physical  
189 proximity with at least one infectious node. Specifically, one infectious cow (node 1) will be able to transmit  
190 RVFV to a susceptible cow (node 2) only if there are enough RVFV competent mosquitoes to first bite the  
191 infectious cow (node 1) then, after an appropriate period of time for the virus to disperse and replicate in the  
192 mosquito, bite a susceptible cow (node 2) [9].

193 As we have said above, the links between cattle in the network represent the feasibility of virus transfer via  
194 mosquitoes once cows are in physical proximity for a sufficient period of time – balanced by whether cows are  
195 naturally near each other within a sub-county or whether they come in contact due to trade-related cattle



196 movement among sub-counties.

197 The node transition graph in **Fig. 1** represents the sequence of the progression of the RVFV infection in a cow  
198 (node) through four compartments, and is the core of the spread model: Once a susceptible ( $S$ ) node is in  
199 physical proximity of an infectious node, virus transfer takes place with a rate  $\beta$  that is equal to the transmission  
200 rate, which is directly proportional to vectorial capacity, and moves the cow into the exposed ( $E$ ) compartment.  
201 If a susceptible cow has  $Y_i$  infectious neighbors, then the probability of the susceptible cow to receive virus  
202 transmission is  $\beta Y_i$ . Therefore, the total rate at which susceptible cows can become infected is proportional to  
203 the number of infectious cows in the neighborhood and the vectorial capacity of available mosquito vectors.  
204 The transition of the cow from the exposed compartment ( $E$ ) to the infectious ( $I$ ) compartment takes place at a  
205 rate  $\delta$ , and represents the time the pathogen will take once it enters into the host body to replicate enough for  
206 the cow to become infectious – i.e., capable of infecting a naïve mosquito which may then infect a susceptible  
207 cow. Infectious cows are finally transferred to the recovered/removed compartment ( $R$ ) with a rate  $\gamma$ . We did  
208 not distinguish whether RVFV-infected cows died or were recovered in this model; the endpoint in the  
209 simulation for an individual cow (node) was reached when it entered the  $R$  compartment.

210 Among these three transitions, the virus transfer from susceptible to exposed is called an edge-based transition  
211 because of the dependency on competent mosquito species, infectious cattle, and susceptible cattle. A  
212 transmission is possible only when there is a link between infectious and susceptible cattle. This link does not  
213 represent a physical contact between cattle, but rather the possibility of RVFV transfer via mosquito from  
214 infectious cattle to a susceptible one. The other two transitions, exposed to infectious and infectious to  
215 recovered, are called node-based transitions as they are dependent only on the host node.

216 After developing the individual-based SEIR network model for Kabale District, we carried out extensive  
217 simulations using Generalized Epidemic Modeling Framework (GEMF) that was developed by the Network  
218 Science and Engineering (NetSE) group at Kansas State University [4, 13]. In the SEIR model based on GEMF,  
219 infection processes were Poisson processes independent of each other. The node-level Markov process for node  
220  $i$ ,  $i= 1, 2, \dots, N$ , is expressed as:

$$221 \quad \Pr[x_i(t + \Delta t) = 1 \mid x_i(t) = 0, X(t)] = \beta Y_i \Delta t + o(\Delta t),$$

222 
$$\Pr[x_i(t + \Delta t) = 2 \mid x_i(t) = 1, X(t)] = \lambda\Delta t + o(\Delta t),$$

223 
$$\Pr[x_i(t + \Delta t) = 3 \mid x_i(t) = 2, X(t)] = \delta\Delta t + o(\Delta t),$$

224 where  $x_i = 0, 1, 2,$  or  $3,$  which correspond to node  $i$  being in the susceptible, exposed, infectious, or  
225 recovered/removed state, respectively [9]. The value  $X(t)$  is the joint state of all nodes – the network state – at  
226 time  $t.$  In our model we used GEMF because it is individual-based which provides more accurate predictions  
227 than meta-population models [9] when we have real world data available. This individual-based GEMF model  
228 has also the ability to incorporate more complex network topologies when individual animal contact data are  
229 available.

### 230 **Cattle Network Scenarios**

231 In the data set shown in **Table 1** two different kinds of cattle—*indigenous* and *exotic*— are accounted for in  
232 Kabale District, totaling 20,806 cows. There are cases in the literature indicating exotic cattle showed more  
233 susceptibility to RVF than indigenous cattle [14]. In Kenya, indigenous cattle exhibit fewer symptoms from  
234 RVFV infection and these cattle might also develop lower viremia which could significantly impact transfer of  
235 virus to mosquito vectors. However, we do not have specific information on relative susceptibility of indigenous  
236 compared to exotic cattle for the Kabale District in Uganda. This relative susceptibility could vary with breed  
237 as well as origin. Therefore, we assumed two different network scenarios to capture the relative susceptibility  
238 of exotic versus indigenous cattle breeds while performing simulations with GEMF: a *homogenous* network  
239 and a *heterogenous* network.

240 In the *homogenous* cattle contact network we considered that all cattle, indigenous or exotic, have the same  
241 susceptibility for RVFV. Therefore, we used the total number of cattle in each sub-county rather than  
242 differentiating them in two different categories.

243 In the *heterogeneous* cattle contact network we considered that exotic cattle are more susceptible to RVFV than  
244 indigenous cattle. Lacking the proper knowledge about the relative susceptibility, we assumed that if exotic  
245 cattle have a susceptibility  $\zeta,$  then indigenous cattle have a susceptibility of  $\mu\zeta,$  where  $\mu$  has a value between  
246 zero and one. For simulation purposes, we assumed  $\mu=0.7.$  We can adjust the value of  $\mu$  once real world data

247 on relative susceptibility are available.

248

## 249 **Simulation Results and Discussion**

250 We carried out extensive simulations under different conditions of cattle movement among sub-counties as well  
251 as different starting conditions to test the effectiveness of mosquito control and movement regulations, as well  
252 as the effects of cattle population diversity. We used the GEMF tool to run simulations with the networks  
253 described in *Materials and Methods*. For exponential connections between sub-counties, we used an  
254 exponential distance kernel  $e^{-kd}$ , where  $k$  is the exponential constant and  $d$  is the distance between sub-  
255 counties. We assumed three different values of  $k$ , 0.001, 0.01, and 0.1, to reflect low, medium, and high  
256 movement probability, respectively. However, the network was valid for any value of  $k$ . We choose these values  
257 to explore the spectrum of varying movement probabilities in the network, and presented our simulations in  
258 three different sets, as follows.

259 For the first set, we presented simulation results for the three values of  $k$  as well as two ranges of the transmission  
260 rate  $\beta$ . Transmission rates incorporate mosquito abundance and weather factors such as humidity, temperature,  
261 and rainfall. Lacking sufficient data about cattle movement structure and mosquito vectorial capacity in Kabale  
262 District, we assumed these values according to Scoglio et al. [9] and Riad et al. [15] to explore a spectrum of  
263 cattle movement probability and mosquito abundance. Also lacking specific information about the value of  $\beta$ ,  
264 we performed simulations for two different sets of  $\beta$  and two different network structures (*homogenous* and  
265 *heterogenous*) for each set of  $\beta$  and observed the variability in the fraction of infected cattle at the end of a  
266 period of 100 days, keeping weather factors constant and starting each simulation with only one infected cattle  
267 in the Kabale Municipality (**Fig. 2**).

268 For the second set of simulations, we showed the evolution of cattle in different compartments in the SEIR  
269 model by choosing a set of values of  $\beta$  (0.001, 0.005, 0.01, and 0.03) and starting with only one infected cattle  
270 in the Kabale Municipality (**Fig. 2**) for each simulation. The fraction of cattle in each compartment was plotted  
271 against time for these values of  $\beta$ . To reduce the number of simulations we choose medium cattle movement

272 probability constant where  $k=0.01$ .

273 The third set of simulations consisted of investigating the effects of different starting conditions. We conducted  
274 simulations with different locations for the initial infected cattle, as well as single location and simultaneous  
275 multiple location epizootic outbreaks. We configured the network with values of  $k=0.01$  and performed  
276 simulations for  $\beta=0.001, 0.005, 0.01, \text{ and } 0.03$  to reduce the number of simulation scenarios.

277 Therefore, we explored three different simulation sets, each consisting of a number of simulation scenarios,  
278 described as follows.

279

## 280 **Simulation Set I**

281 In this set, simulations were initiated with a single infected cattle in the Kabale Municipality and conducted  
282 with three values of  $k$  (0.001, 0.01, and 0.1), two ranges of  $\beta$  (0.001-0.005 or 0.001-0.048), and two network  
283 topologies (*homogeneous* and *heterogeneous*), producing four scenarios:

284 **Scenario 1:** *Homogenous* network and  $\beta$  range 0.0001-0.005

285 **Scenario 2:** *Homogenous* network and  $\beta$  range 0.001-0.048

286 **Scenario 3:** *Heterogeneous* network and  $\beta$  range 0.0001-0.005

287 **Scenario 4:** *Heterogeneous* network and  $\beta$  range 0.001-0.048

### 288 **Scenario 1**

289 The simulation for  $\beta$  ranging between 0.0001-0.005 (the lower range) is presented **Figs 4** for three different  
290 values of the exponential constant  $k$  and a *homogenous* network. We ran the simulation for 100 days and  
291 recorded the fraction of infected cattle for each value of  $\beta$ .

292 **Fig. 4: Comparisons among fractions of infected cattle for *homogeneous* network for three different values of  $k$  and**  
293 **lower range of  $\beta$ . Blue dots shows fraction of infected  $k=0.1$ , while red rectangles and green triangles showed fraction**

294 **of infected for  $k=0.01$  and  $0.001$  respectively. For the same value of transmission rate, we have always more infected**  
295 **cattle for greater value of  $k$  ( $0.1$ ) than the smaller ones ( $0.01$  and  $0.001$ ). Therefore, therefore increasing movement**  
296 **probability means more widespread epizootic, in particular for higher values of  $\beta$  such that the fraction of infected**  
297 **cattle at  $\beta=0.005$  is  $\sim 0.399$ ,  $\sim 0.537$ , and  $\sim 1$  for  $k=0.001$ ,  $0.01$ , and  $0.1$ , respectively.**

298 From **Fig. 4**, for  $k=0.01$  and  $0.001$  we can see that after hundred days and for  $\beta=0.005$  the infection reaches  
299 half the population. However, for  $k=0.1$ , after 100 days almost all of the cattle were infected. This is because  
300 the network was densely connected and it was easier for RVFV to be transmitted between individual animals  
301 than between sub-counties. This demonstrates that network structure plays a prominent role in RVFV spreading  
302 when the value of  $\beta$  is small. A value of  $k=0.1$  means that extensive cattle movement between sub-counties will  
303 lead to infections in all cattle.

## 304 **Scenario 2**

305 In the second set of simulations we used a  $\beta$  ranging from  $0.001$  to  $0.048$  (the upper range) for the *homogenous*  
306 network. Simulations results using these values are presented in **Fig. 5** for all three values of the parameter  $k$ .

307 **Fig. 5: Comparisons among fractions of infected cattle for *homogeneous* network for three different values of  $k$  and**  
308 **upper range of  $\beta$ . Fractions of infected for all three values of  $k$  are almost overlapping, therefore, are not sensitive**  
309 **to the movement probability. They reach a value very close to 1, i.e., all 20,806 cattle became infected when**  
310 **transmission rate  $\beta$  reached 0.01 for the three networks. Therefore, fractions of infected cattle are also independent**  
311 **of the transmission rate  $\beta$  upper range.**

312 From **Fig. 5** we can see that fraction of infected cattle reached 1 very quickly for this particular range of  $\beta$  for  
313 all three values of  $k$ . This is because we already have connections between sub-counties for all three networks.  
314 The whole cattle network becomes infected irrespective of the transmission rate ( $\beta$ ) or cattle movement  
315 probability ( $k$ ) the Therefore, we can say that for upper values of  $\beta$ , i.e., for higher abundance of mosquitoes  
316 and favorable weather conditions, the infection spread does not depend on the network structure and spreads  
317 throughout the whole network very quickly.

## 318 **Scenario 3**

319 In this scenario, we repeat the simulations for the lower range of  $\beta$  but for the *heterogeneous* network, and  
320 simulation results for three different values of  $k$  are presented in **Fig. 6**. There are increasing trends with the  
321 increase of  $\beta$  as well as  $k$  in the fractions infected cattle. For  $k$  0.001 and 0.01, there is little difference; however,  
322 for  $k=0.1$  the increase of the infected fraction is faster with increasing  $\beta$ . Therefore, if we want to reduce or  
323 check the spreading of RVFV, we need to reduce cattle movement. When we reduce cattle movement, only half  
324 the population becomes infected for the highest value of the transmission rate in the lower range. Therefore,  
325 reducing the cattle movement can reduce the number of infected cattle when there is a lower mosquito  
326 abundance and thus lower transmission rate.

327 **Fig. 6: Comparisons among fractions of infected cattle for *heterogeneous* network for three different values of  $k$**   
328 **and lower range of  $\beta$ . For  $k=0.001$  and 0.01, maximum fraction of infected cattle is less than 0.5 for the highest value**  
329 **of transmission rate in the lower range, that means after the simulation period half of the cattle become infected.**  
330 **However for  $k=0.1$ , the infected cattle reaches up to 0.8. Therefore, we need to reduce the value of  $k$  i.e., cattle**  
331 **movement to reduce the fraction infected cattle**

#### 332 **Scenario 4**

333 Simulation results for the *heterogeneous* network and for the upper range of  $\beta$  are shown in **Fig. 7**. For all three  
334 values of  $k$ , the fraction of infected cattle reached 1 very quickly, near a  $\beta$  value of 0.02. After that, all 20,806 cattle become  
335 infected regardless of the values of  $\beta$  and  $k$ .

336 **Fig. 7: Comparisons among fractions of infected cattle for *heterogeneous* network for three different values of  $k$**   
337 **and for upper range of  $\beta$ . The fractions of infected reaches towards one rapidly and when the value of transmission**  
338 **rate is 0.03, fraction of infected become one for three networks**

339 The trend of the fraction of infected cattle for both *homogenous* and *heterogeneous* networks are similar in both  
340 lower and upper ranges of  $\beta$ . However, there are differences between fractions of infected cattle from  
341 *homogenous* compared to *heterogeneous* networks for same value of  $k$  and same range of transmission rate  
342 values. Comparisons between fractions of infected cattle for *homogenous* and *heterogeneous* networks are  
343 shown in **Figs 8 and 9**.

344 **Fig. 8** shows comparisons between fractions of infected for *homogeneous* and *heterogeneous* network for lower  
345 range of  $\beta$  values, and shows that the *homogenous* network has more infected cattle for the same values of  $\beta$   
346 compared to the *heterogeneous* network.

347 **Fig. 8: Comparisons among fractions of infected cattle for *heterogeneous* and *homogenous* networks for lower**  
348 **range of  $\beta$  and a)  $k=0.01$  and b)  $k=0.1$**

349 In **Fig. 9** we can see similar outcomes, where more infected cattle result from the *homogenous* network. This  
350 can be attributed to the fact that, in the *heterogeneous* network, the indigenous cattle shows less susceptibility  
351 than the exotic cattle. Indigenous cattle species for being in that region for a very time, have developed certain  
352 immunity against RVF or other common diseases and they are more immune to RVFV than exotic cattle.  
353 Therefore, indigenous cattle are more likely not to get infected which results in a fewer number of infected  
354 cows than *homogenous* network where all animals are equally susceptible.

355 **Fig. 9: Comparisons among fractions of infected cattle for *heterogeneous* and *homogenous* networks for the upper**  
356 **range of  $\beta$  and a)  $k=0.01$  and b)  $k=0.1$**

357 The comparisons between *homogenous* and *heterogeneous* networks show that reduced susceptibility of  
358 indigenous cattle to RVFV means a lower number of infected cattle during an RVFV epizootic. Therefore,  
359 greater proportions of indigenous cattle across sub-counties will reduce the numbers of infected cattle and thus  
360 a more contained epizootic.

361 In summary, simulations with lower transmission rates result in increasing fractions of infected cattle with  
362 increasing movement probability. However, for high transmission rates, the fraction reaches 1 quickly for  
363  $\beta=0.01$  and for *heterogeneous* network  $\beta=0.03$  and there is little difference for increasing movement  
364 probabilities. From these observations we conclude that for low transmission rates (low mosquito abundance),  
365 restricted cattle movement will reduce the number of infected cattle. Higher transmission rates result in all cattle  
366 in the network becoming infected, regardless of cattle movement probability or mosquito abundance  
367 /transmission rate. These observations provide clear mitigation strategies to reduce the spread of RVFV. For a  
368 period of low mosquito abundance, cattle movement should be restricted to contain the epizootic to a minimum  
369 level; whereas, periods of high mosquito abundance (high transmission rates) require both mosquito control

370 and cattle movement restriction. Comparisons between fractions of infected for *homogenous* versus  
371 *heterogeneous* networks suggest that diversity in the network results in fewer infected cattle for similar values  
372 of transmission rates and cattle movements.

## 373 **Simulation Set II**

374 Simulations were conducted starting with a single infected cow in Kabale Municipality and simulations were  
375 conducted for a period of 100 d using both *homogeneous* and *heterogeneous* networks with  $k=0.01$  and for  $\beta=$   
376  $0.001, 0.005, 0.01, \text{ and } 0.03$  for each network, producing two scenarios:

377 **Scenario 1:** *Homogenous* network

378 **Scenario 2:** *Heterogeneous* network

379 We plotted the fraction of cattle in each compartment against time in Simulation Set II. For each scenario in  
380 this set, we assumed four different  $\beta$  to represent the entire range of transmission rates used for Simulation Set  
381 I. Instead of using different movement probability constants ( $k=0.001, 0.01, \text{ and } 0.1$ ) we choose  $k=0.01$  for both  
382 *homogeneous* and *heterogeneous* networks.

## 383 **Scenario 1**

384 Simulation results for *homogenous* network and single infected cattle in Kabale Municipality for selected values  
385 of  $\beta$  are presented in **Fig. 10**. As we increase the value of  $\beta$  from 0.001 to 0.03, the fractions of recovered reach  
386 1 very quickly. A very important point to be noted here is that fractions of recovered means these were the cattle  
387 who were infected in the first place. As we have not considered any disease induced mortality in the model, all  
388 infected cattle move to the recovered compartment. Therefore, the fraction of recovered cattle can be considered  
389 the cumulative fraction of infected for our specific model.

390 **Fig. 10: Fraction of cattle in each compartment with 95% confidence interval for  $\beta=0.001$  (top left),  $0.005$  (top right),**  
391  **$0.01$  (bottom left), and  $0.03$  (bottom right) and for *homogeneous* network. Increasing  $\beta$  shows an increasing trend**  
392 **in the overall fractions of recovered (cumulative fractions of infected)**

393 **Table II: Table showing maximum infected fractions of cattle, peak infection time, and rate at which that maximum**



394 is attained for *homogeneous* network.

| Transmission rate $\beta$ | Maximum infected fraction | Peak infection time | Rate       |
|---------------------------|---------------------------|---------------------|------------|
| 0.001                     | 0.0095                    | 45                  | 2.1268e-04 |
| 0.005                     | 0.065                     | 87                  | 6.919e-04  |
| 0.01                      | 0.0806                    | 64                  | 0.0013     |
| 0.03                      | 0.1345                    | 31                  | 0.0043     |

395

## 396 Scenario 2

397 Simulation results for *heterogeneous* network with the initial condition of a single infected cattle in Kabale  
 398 Municipality is presented in **Fig. 11**.

399 **Fig. 11: Fraction of cattle in each compartment with 95% confidence interval for  $\beta=0.001$  (top left), 0.005 (top right),**  
 400 **0.01 (bottom left), and 0.03 (bottom right) and for *heterogeneous* network. Increasing  $\beta$  shows an increasing trend**  
 401 **in the overall fractions of recovered (cumulative fractions of infected) which reaches to almost 1 for  $\beta=0.03$ .**

402 **Table III: Table showing maximum infected fractions of cattle, peak infection time, and rate at which that**  
 403 **maximum is attained for heterogeneous network and a single infected cattle at Kabale municipality.**

| Transmission rate $\beta$ | Maximum infected fraction | Peak infection time | Rate       |
|---------------------------|---------------------------|---------------------|------------|
| 0.001                     | 0.0056                    | 60                  | 9.333e-05  |
| 0.005                     | 0.0365                    | 100                 | 3.6479e-04 |
| 0.01                      | 0.0739                    | 76                  | 9.7690e-04 |
| 0.03                      | 0.1181                    | 43                  | 0.0027     |

404

405 From **Table II** and **III**, it is evident that with the increase of  $\beta$ , the rate at which the fraction of infected reaches  
 406 the maximum increases. However, there is an interesting trend that when the value of  $\beta$  is very small, i.e.,  
 407  $\beta=0.001$ , the fraction of infected reaches the maximum faster for both *homogeneous* and *heterogeneous*  
 408 networks than for a value of  $\beta=0.005$ . This can be attributed to the fact that, when the value of  $\beta$  is very small,  
 409 the infection takes a long time to reach distant locations. Therefore, only cattle in the Kabale Municipality  
 410 become infected within our simulation period of 100 d. When we increase  $\beta$ , infection reaches distant locations  
 411 yet slower than the rate of infecting animals only in the initial location. However, when infection reaches distant  
 412 locations, there are greater numbers of infected cattle in the network as a whole. This is evident from the  
 413 maximum fraction of cattle, which is greater than the maximum fraction of infected cattle for  $\beta=0.001$ . Although  
 414 the length of time taken for infections to reach maximum is greater for  $\beta=0.005$  and 0.01, the rate always shows

415 an increasing trend. Therefore, the increase in the transmission rate increases the severity of the epizootic.  
416 However, when  $\beta$  is sufficiently large (0.03), the time to reach maximum is less than time taken for  $\beta=0.001$ .  
417 Simulation results indicate that increase in the transmission rate expedites the spread of the epizootic in distant  
418 locations as well as the quantity of infected cattle. Therefore, mosquito control is crucial to contain the epizootic  
419 in the initial outbreak location while taking proper measures to care for infected cattle.

### 420 **Simulation Set III**

421 These simulations were conducted with initial conditions other than starting simulation with a single infected  
422 cow in Kabale Municipality for both *homogeneous* and *heterogeneous* networks, as follows:

423 **Scenario 1:** Infection starts at 1 location (Bubale sub-county) with a maximum number of cattle

424 **Scenario 2:** Infection starts simultaneously at 3 locations (Bauble, Rubaya, and Hamurwa sub-counties)  
425 with a maximum number of cattle

426 **Scenario 3:** Infection starts at 1 location (Muhanga T/C) with a minimum number of cattle

427 **Scenario 4:** Infection starts simultaneously at 3 3 locations (Bukinda, Muhanga, and Ruhija sub-  
428 counties) with a minimum number of cattle

429 For detailed descriptions of simulation results from Simulation Set III, refer to the *Supporting Material*. We  
430 plotted the time to reach the maximum infection for each scenario with the transmission rate  $\beta$  in **Fig. 12**, which  
431 shows a brief summary of *Scenario 1* and *2* simulations when the initial RVF outbreak occurs in a single  
432 location (Bubale) or simultaneously at multiple locations (Bauble, Rubaya, and Hamurwa sub-counties),  
433 respectively.

434 Time taken to reach the maximum infection is smaller for simultaneous outbreaks regardless of the network  
435 structure than single-location outbreaks for similar values of the transmission rate  $\beta$  (**Fig. 12**). The spreading of  
436 infection through the network is always slower in the *heterogeneous* network for both single and simultaneous  
437 outbreaks. Infections spread slowly for the single-location outbreak in the network compare to the rate of spread  
438 in simultaneous outbreaks, which is reflected by the higher peak incidence time. For  $\beta=0.001$ , the peak infection

439 time is close to 100 d for all simulations except simultaneous outbreaks in *homogeneous* networks (**Fig. 12**).  
440 This means that the peak has not been reached yet, and the number of infected cattle is still increasing. When  
441 we increase  $\beta$  to 0.01 (high mosquito abundance), the time to reach the peak reduces drastically for all of them.

442 **Fig. 12: Peak infection time with transmission rate and for outbreaks starting in location/locations with (a) greater**  
443 **number of cattle and (b) fewer number of cattle.**

444 An interesting trend emerges from **Fig. 12a**: when the value of transmission rate increases to 0.03, there is an  
445 increase in the time to reach maximum. This can be attributed to the fact that, when  $\beta=0.03$ , after our 100 d  
446 simulation period, all cattle were infected. Therefore, there are several time points when we have a peak in the  
447 fractions of infected animals at the same time (cattle recovered once they are infected, they stay in the infected  
448 compartment for a short period of time). The first peak infection can occur when infection spreads only in the  
449 initial location where the outbreak occurs, and the second peak can occur when infection spreads only to  
450 densely connected locations. Greater number of cattle location is densely connected with other location cattle  
451 in the network. Therefore, given enough mosquito abundance, the infections keep spreading to distant locations  
452 which result in an all-inclusive but a comparatively slower time to reach the peak for  $\beta=0.03$ . Here, a very  
453 important point to be noted that if we allow the simulation to run for a longer period of time, then we may  
454 observe a similar pattern of the peak infection time for all values of  $\beta$ . However, we limit our scope to 100 d  
455 simulation period in these simulations.

456

457 **Fig. 12b** represents peak incidence time when the RVF outbreak occurs in location/locations with fewer cattle  
458 than other locations. For lower mosquito abundance ( $\beta=0.001$ ), infection does not reach distant locations, rather  
459 it is quickly confined to the initial location/locations, as is evident from smaller values of the peak infection  
460 time. However, with increase of  $\beta$ , the peak time returns to its regular pattern shown in **Fig. 12a**. We also don't  
461 see any aberrant behavior for any selected scenario as seen in **Fig. 15(a)**, outbreaks being started in locations  
462 with sparse connections to other locations.

463

## 464 **Conclusions**

465 Simulation results across multiple scenarios within these three simulation sets provide us important mitigation  
466 and intervention strategies. When a RVF outbreak occurs in a location with greater number of cattle, the  
467 infection spreads faster while infecting greater numbers of cattle than when an outbreak occurs in a location  
468 with fewer cattle. Therefore, the more the cattle in the initial outbreak location, the faster the spread and the  
469 more severe the epizootic. Simultaneous outbreaks in multiple locations will result in more severe and faster  
470 spreading of the epizootic than outbreak in a single location. That is evident from the values of the time to reach  
471 the maximum infection (**Fig. 12**) and rate at which the maximum infection is reached (refer to Tables in  
472 *Supplementary Material*). Simulation results for different initial conditions and from both *homogeneous* and  
473 *heterogeneous* networks reveal similar patterns. Given the same initial conditions, the *heterogeneous* network  
474 is less susceptible to infection than the *homogeneous* network. This is evident from the rate at which infection  
475 reaches maximum fraction of infected, the value of the maximum infected fractions, and total cumulative  
476 fraction of infected.

477 We have used the cattle data for Kabale District and created a cattle movement network following an Erdos-  
478 Renyi topology inside each sub-county and exponential topology for inter sub-county movement. We have  
479 created two different networks— *homogenous* and *heterogeneous* – depending on the relative susceptibility of  
480 indigenous and exotic cattle. We used three different exponential parameters for each of the two networks to  
481 explore different spectra in inter sub-county movement probability. These networks were then used to run  
482 individual-based simulation using the GEMF tool developed in K-State NetSE group. From the simulation  
483 results, we saw that when the transmission rate is low, then the spread of RVFV throughout the network is  
484 dependent on inter sub-county movement probability. The more the probability, the more the fraction of  
485 infected cattle after the 100 d simulation period. This means that during periods of low mosquito vectorial  
486 capacity there must be more movement of cattle for a widespread epizootic. Therefore, during periods with  
487 reduced vectorial capacity, prohibition of inter sub-county cattle movement will eventually contain the epizootic  
488 in the initial location of the virus introduction. However, for upper values of transmission rate, i.e., upper  
489 mosquito vectorial competence, there is an increased likelihood of more extensive RVFV transmission that is

490 less dependent the network structure (i.e., movement probability). Although, the risk of a widespread RVF  
491 epizootic is low in Uganda as demonstrated historically, when mosquito vectorial capacity is elevated it  
492 becomes critical to control/reduce mosquitoes to prevent widespread RVFV transmission. From the comparison  
493 of simulation results from *homogenous* and *heterogeneous* networks, we saw that for the same level of vectorial  
494 capacity and inter-subcounty movement probability, *heterogeneous* networks result in less infected cattle than  
495 *homogenous* ones because of the assumed reduced susceptibility of the indigenous cattle than exotic species.  
496 Therefore, the more indigenous cattle we have, the less will be the number of infected animals in the case of an  
497 RVF outbreak.

498 When infection starts in a location with more infected cattle than other locations, the epizootic spreads much  
499 faster than when infection starts in a location with fewer cattle. Simultaneous outbreaks in multiple locations  
500 cause significant increase in the rate to reach in the maximum infection spread. The rate increases with the  
501 increase of the transmission rate as well as the value of cattle movement probability. The location of the  
502 outbreak also plays a major role in the severity of an RVF epizootic. The simulation results from different initial  
503 starting locations showed that simultaneous outbreaks in different locations result in more cumulative infected  
504 cattle as well as faster rate of spreading compared to a single location initial outbreak. Population size in the  
505 initial location is also a crucial factor. The greater the population in the initial location, the faster the spread as  
506 well as the more the cumulative fraction of infected. Our simulation results quantitatively show how long the  
507 infection would take to reach maximum for different network structures as well as different starting conditions.  
508 Mitigation intervention can be devised from these simulation results as they provide us with the quantitative  
509 disease dynamics for epizootic spread. The longer the time to reach the maximum infection, the more time  
510 public and veterinary health personnel have to apply mitigation strategy before the infection becomes  
511 widespread. According to simulation results, applying insecticides to reduce mosquitoes will increase the  
512 spreading time of the infection and a greater opportunity to contain the epizootic by implementing mitigation  
513 strategies such as culling/removing infected cattle from contact with healthy animals via competent mosquito  
514 populations.

## 515 **Acknowledgements**

516 We would like to thank the U.S. Department of Agriculture (USDA) Borlaug International Agricultural Science  
517 and Technology Fellowship Program for funding the fellowship, Center of Excellence for Emerging and  
518 Zoonotic Animal Diseases (CEEZAD) Kansas State University for supporting the fellowship program and  
519 College of Veterinary Medicine International Programs Kansas State University for supporting the fellowship  
520 program

## 521 **References**

1. Tran A, Trevennec C, Lutwama J, Sserugga J, Gély M, Pittiglio C, Pinto J, Chevalier V. Development and assessment of a geographic knowledge-based model for mapping suitable areas for Rift Valley fever transmission in Eastern Africa. *PLoS neglected tropical diseases*. 2016 Sep 15;10(9):e0004999.
2. World Health Organization. Influenza (<http://www.who.int/mediacentre/factsheets/fs211/en/>).
3. Nanyingi MO, Munyua P, Kiama SG, Muchemi GM, Thumbi SM, Bitek AO, Bett B, Muriithi RM, Njenga MK. A systematic review of Rift Valley Fever epidemiology 1931–2014. *Infection ecology & epidemiology*. 2015 Jan 1;5(1):28024.
4. Sahneh FD, Scoglio C, Van Mieghem P. Generalized epidemic mean-field model for spreading processes over multilayer complex networks. *IEEE/ACM Transactions on Networking*. 2013 Oct;21(5):1609-20
5. Davies FG, Linthicum KJ, James AD. Rainfall and epizootic Rift Valley fever. *Bulletin of the World Health Organization*. 1985;63(5):941
6. Anyamba, A., J.-P. Chretien, J. Small, C. J. Tucker, P. Formenty, J. H. Richardson, S. C. Britch, D. C. Schnabel, R. L. Erickson and K. J. Linthicum (2009) Prediction of a Rift Valley fever outbreak. *Proceedings National Academy of Sciences* 106:955-959
7. Linthicum KJ, Britch SC, Anyamba A. Rift Valley fever: An emerging mosquito-borne disease. *Annual Review of Entomology*. 2016 Mar 11;61:395-415
8. Tuncer N, Gulbudak H, Cannataro VL, Martcheva M. Structural and practical identifiability issues of immunological vector–host models with application to Rift Valley Fever. *Bulletin of mathematical biology*. 2016 Sep 1;78(9):1796-827.
9. Scoglio CM, Bosca C, Riad MH, Sahneh FD, Britch SC, Cohnstaedt LW, Linthicum KJ. Biologically Informed Individual-Based Network Model for Rift Valley Fever in the US and Evaluation of Mitigation Strategies. *PloS one*. 2016 Sep 23;11(9):e0162759
10. Uganda Bureau of Statistics (<http://www.ubos.org/>).
11. Bastian M, Heymann S, Jacomy M. Gephi: an open source software for exploring and manipulating networks. *Icwsn*. 2009 May 17;8:361-2.
12. Garrett-Jones C. The human blood index of malaria vectors in relation to epidemiological assessment. *Bulletin of the World Health Organization*. 1964;30(2):241.
13. Sahneh FD, Vajdi A, Shakeri H, Fan F, Scoglio C. GEMFsim: a stochastic simulator for the generalized epidemic modeling framework. *Journal of Computational Science*. 2017 Sep 1;22:36-44.
14. Gould EA, Higgs S. Impact of climate change and other factors on emerging arbovirus diseases. *Transactions of the Royal*

Society of Tropical Medicine and Hygiene. 2009 Feb 1;103(2):109-21.

15. Riad MH, Scoglio CM, McVey DS, Cohnstaedt LW. An individual-level network model for a hypothetical outbreak of Japanese encephalitis in the USA. *Stochastic Environmental Research and Risk Assessment*. 2017 Feb 1;31(2):353-67.
16. Erdős P, Rényi A, Sós VT. On a problem of graph theory. *Studia Sci. Math. Hungar*. 1966;1(215):C235.

Comparisons among fraction of infected cattle for three networks, each with 95% confidence interval

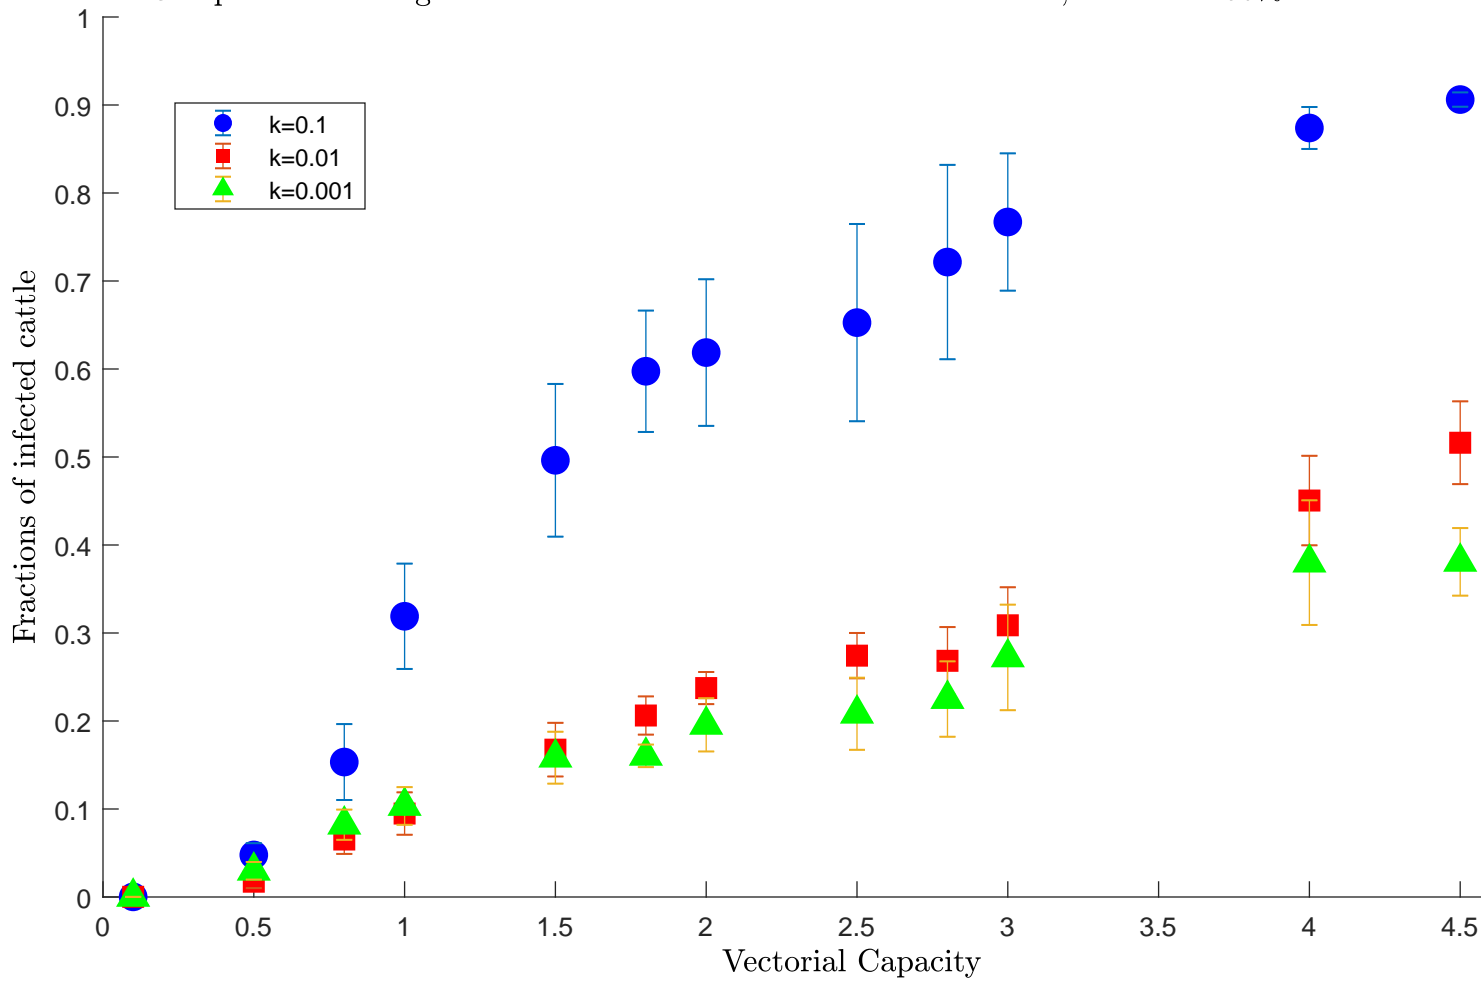



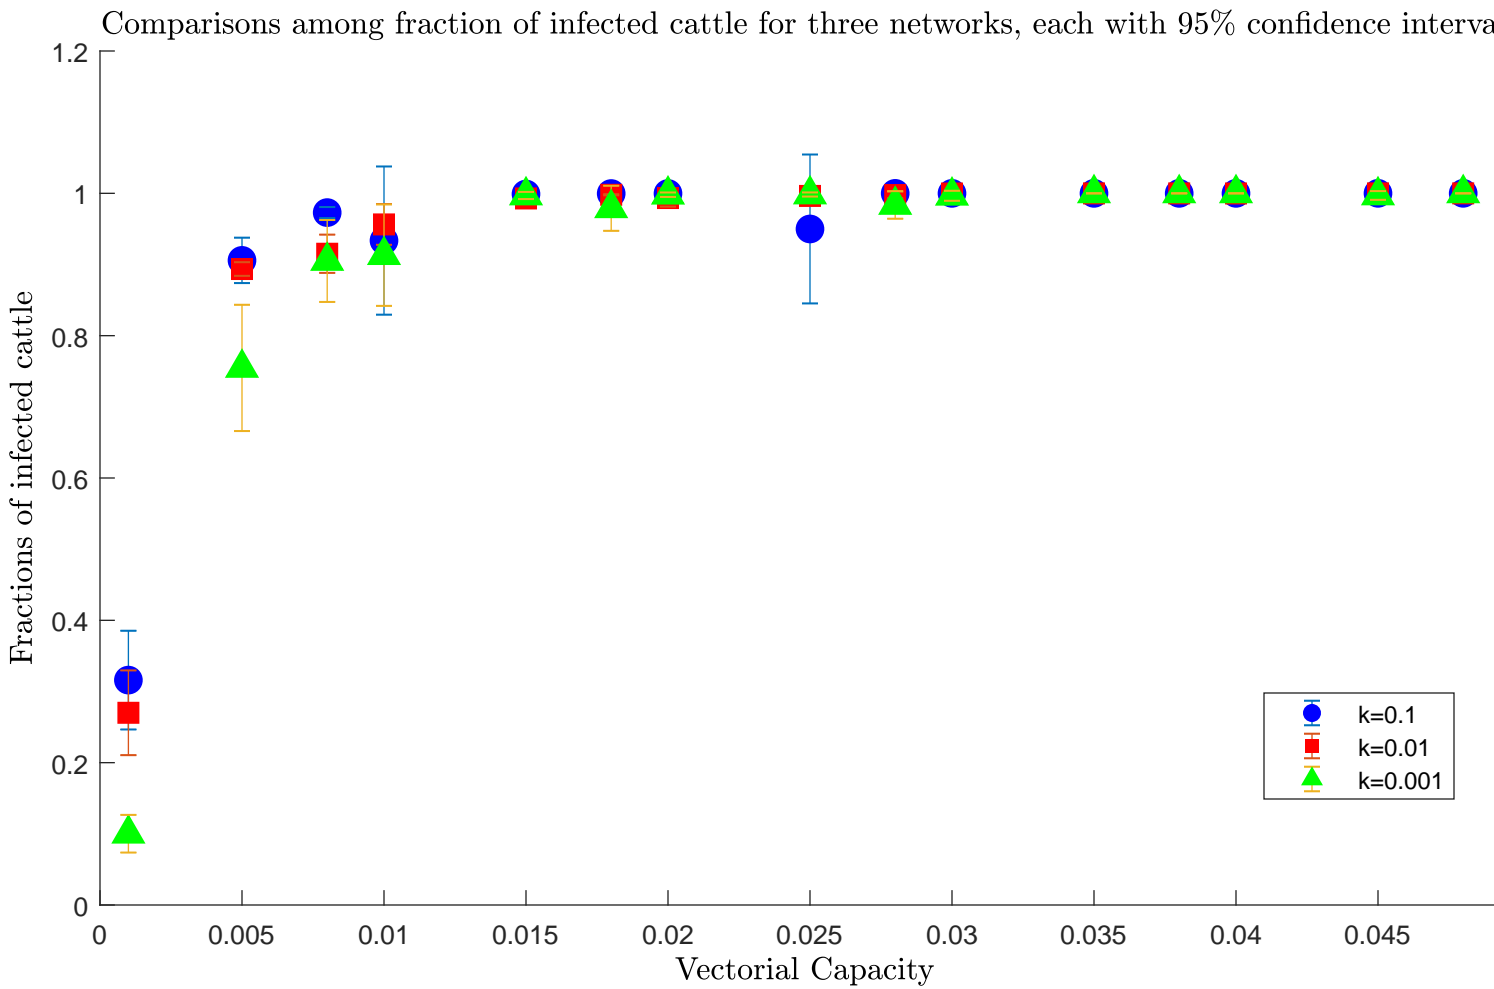

Comparisons among fraction of infected cattle for three networks, each with 95% confidence intervals.

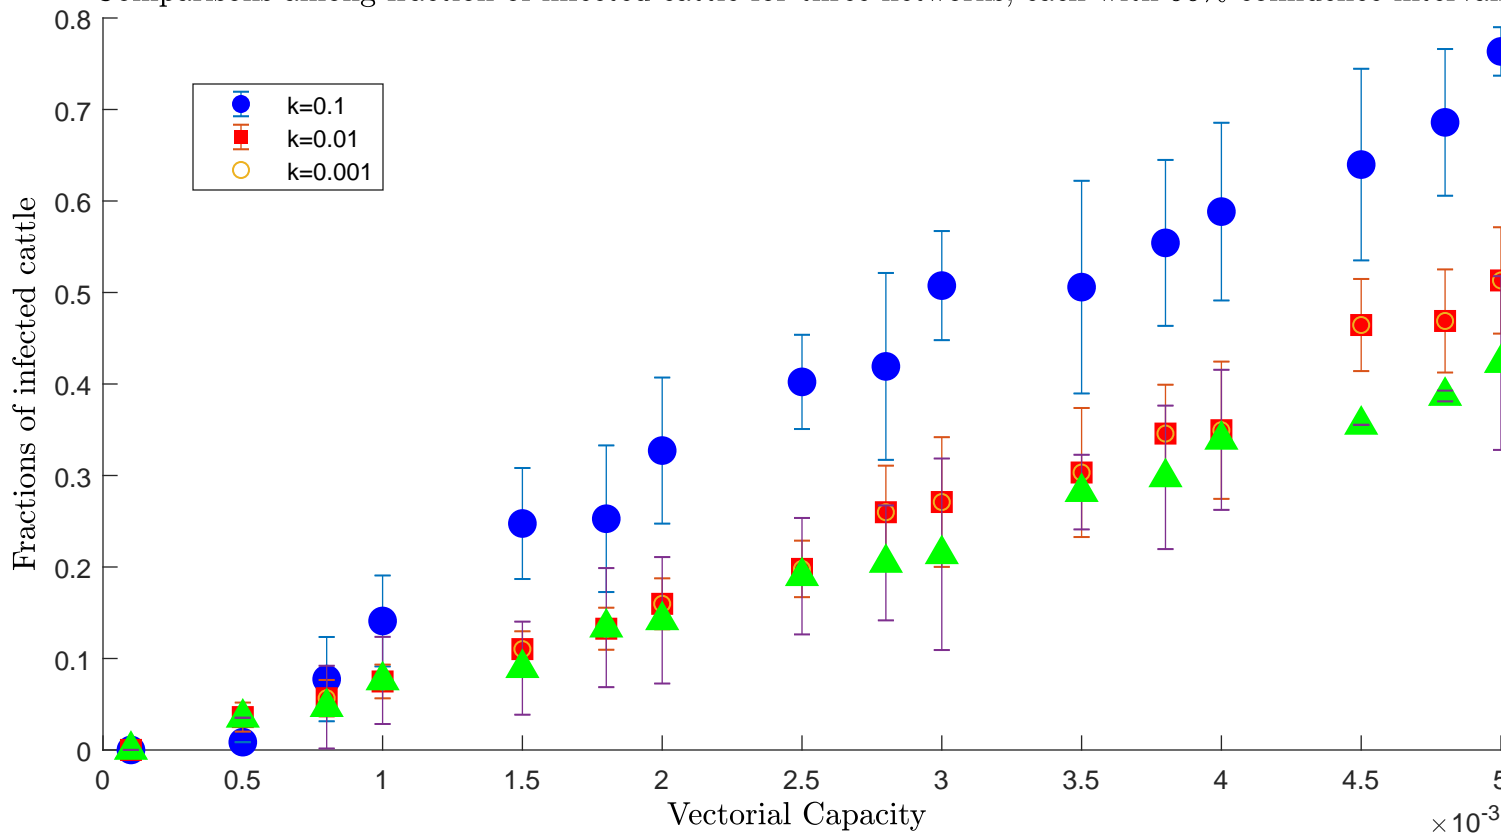

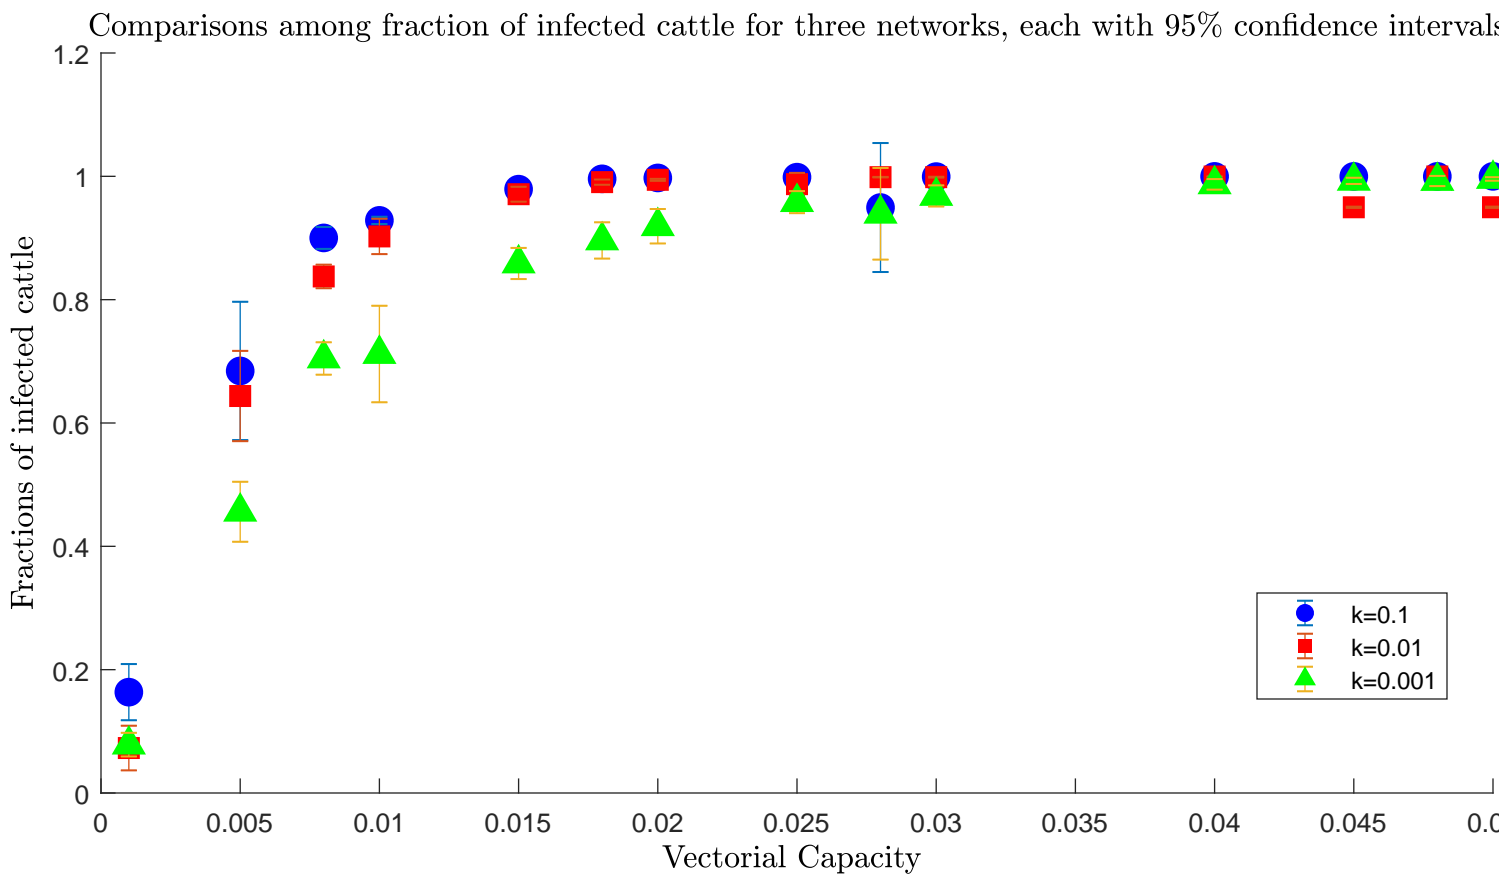

a) Comparison between fraction of infected for network with  $k=0.01$

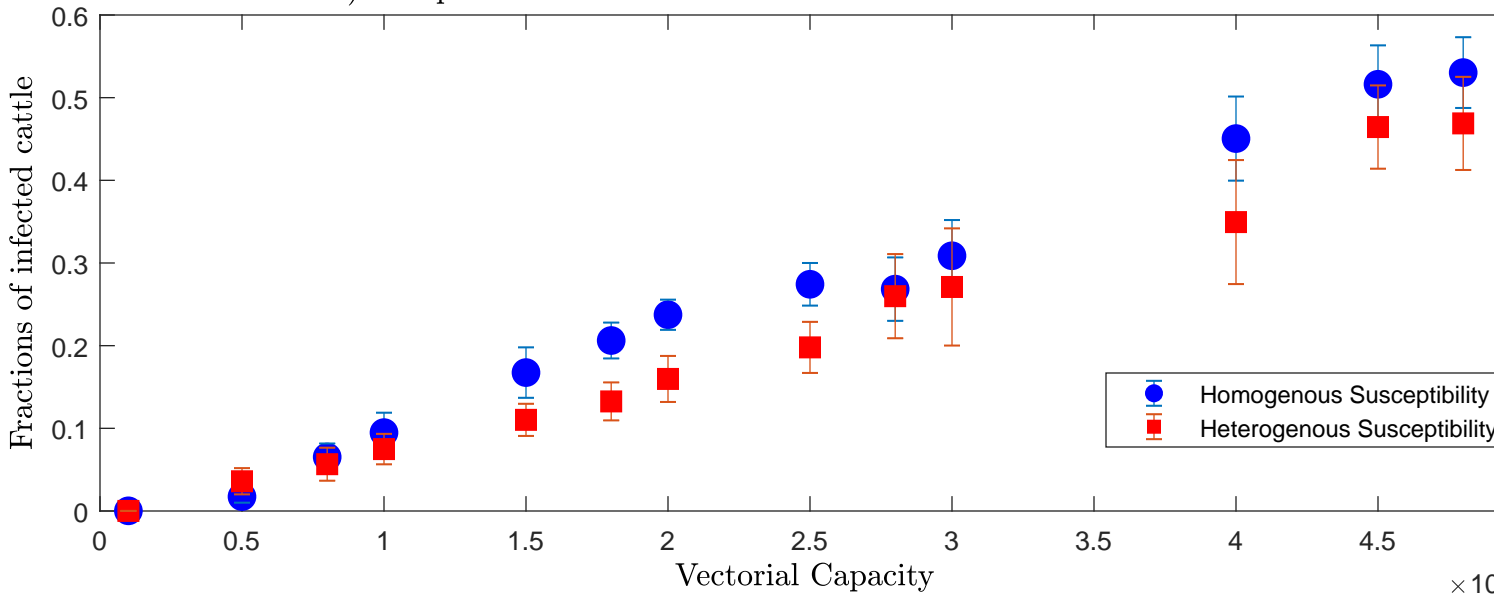

b) Comparison between fraction of infected for network with  $k=0.1$

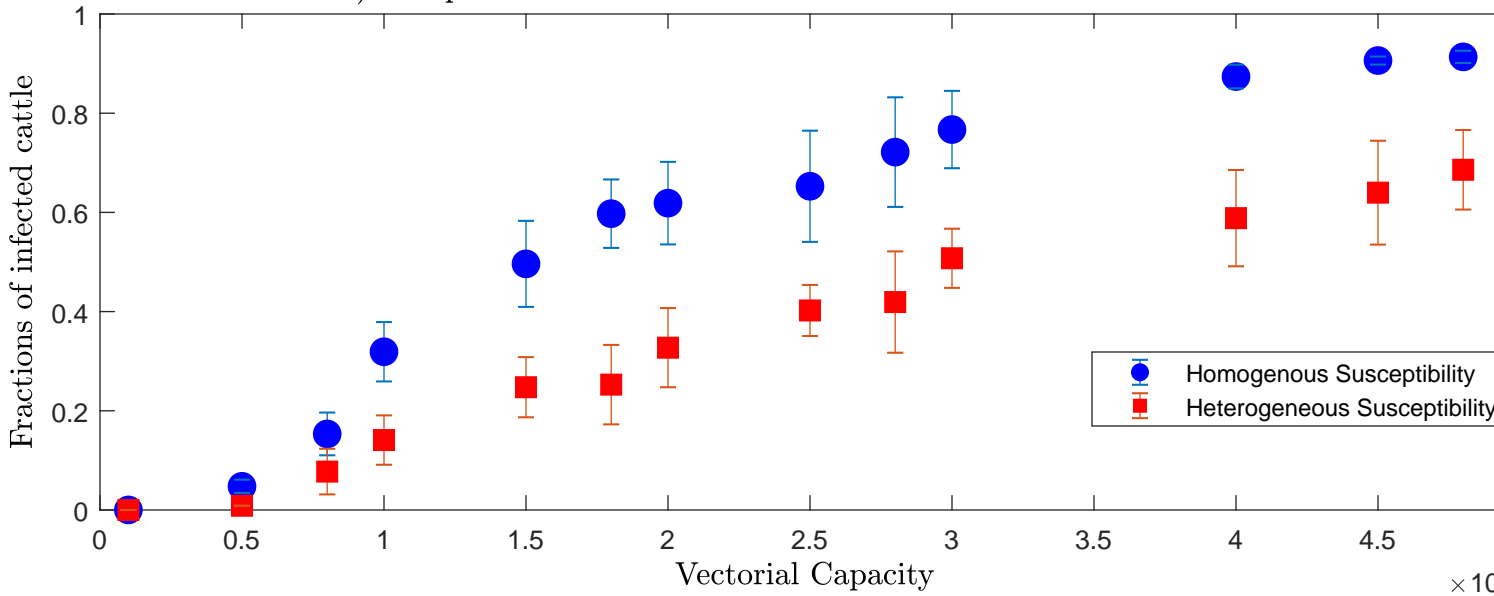

a) Comparison between fraction of infected for network with  $k=0.01$

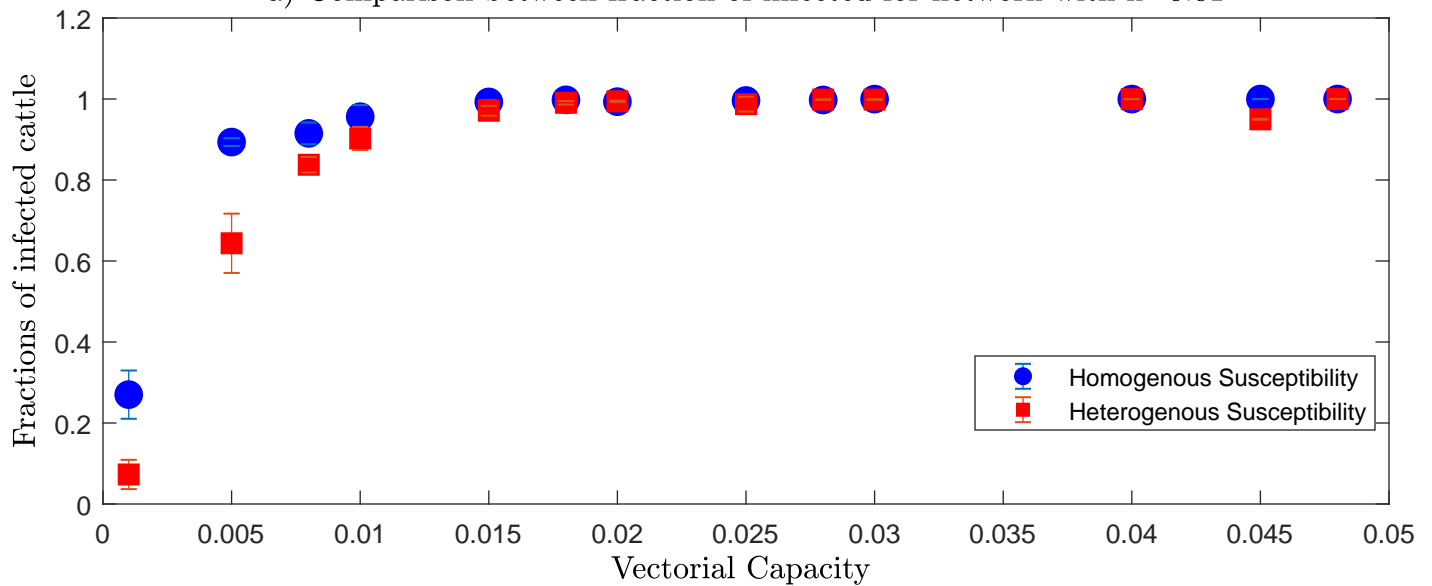

b) Comparison between fraction of infected for network with  $k=0.1$

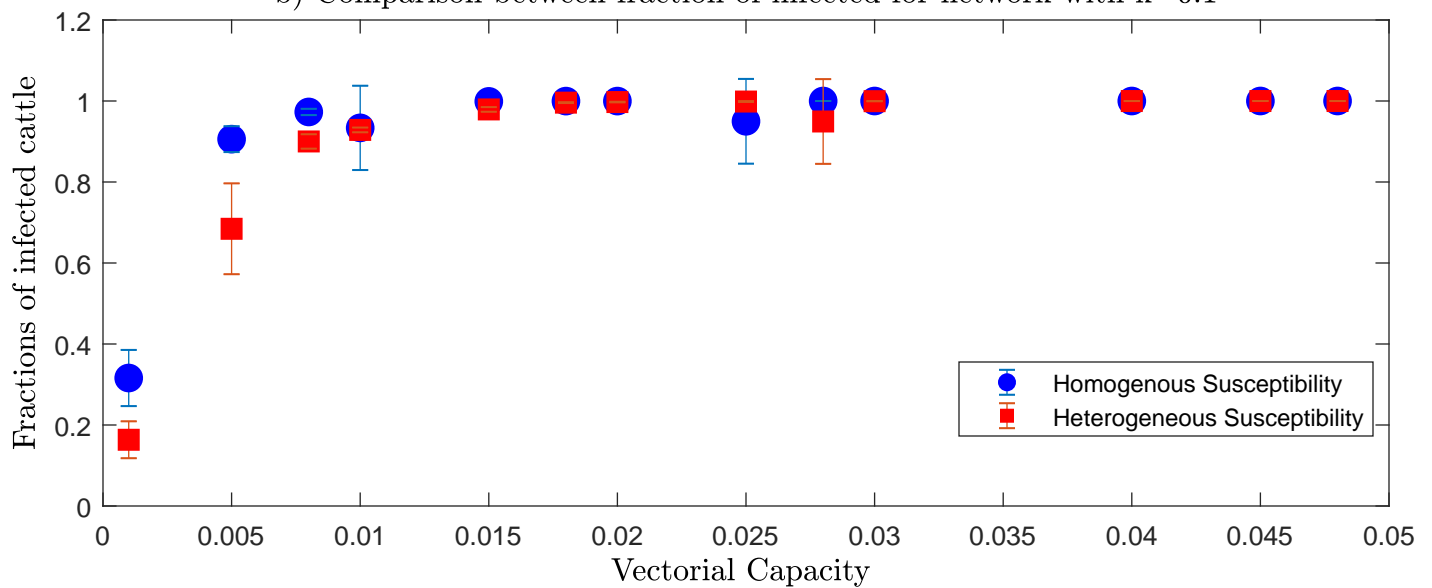

(a) Outbreak in maximum cattle locations

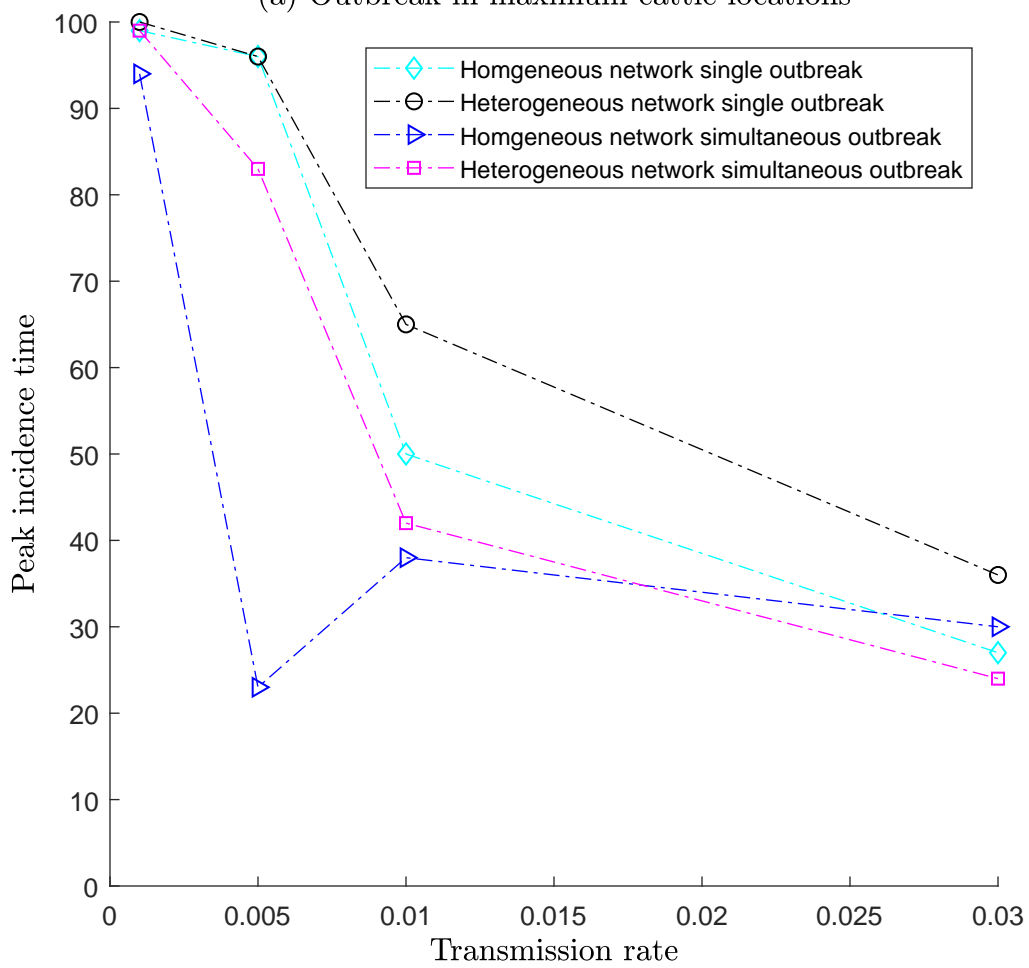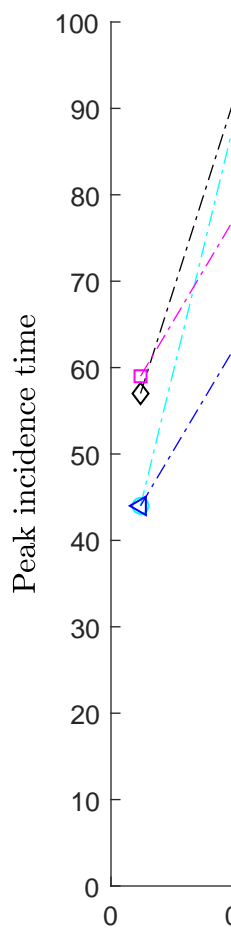

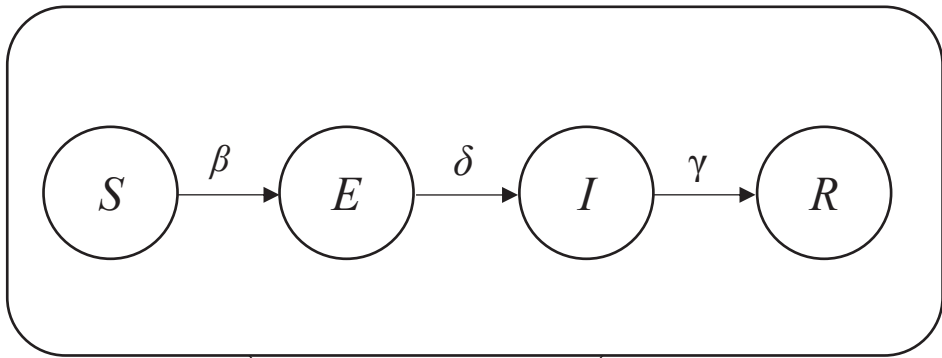

Node Transition Graph

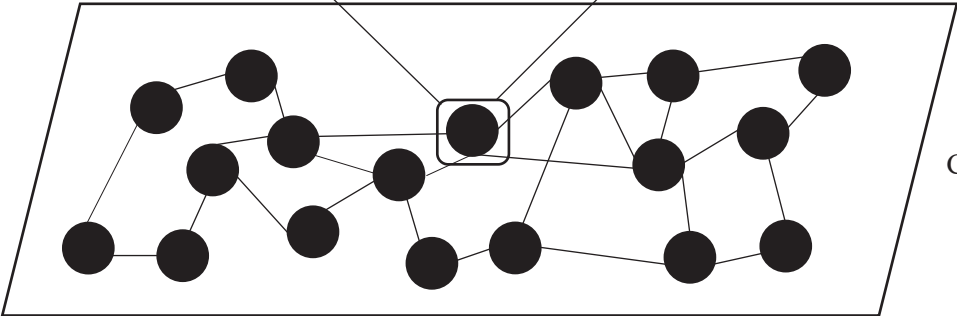

Contact Network

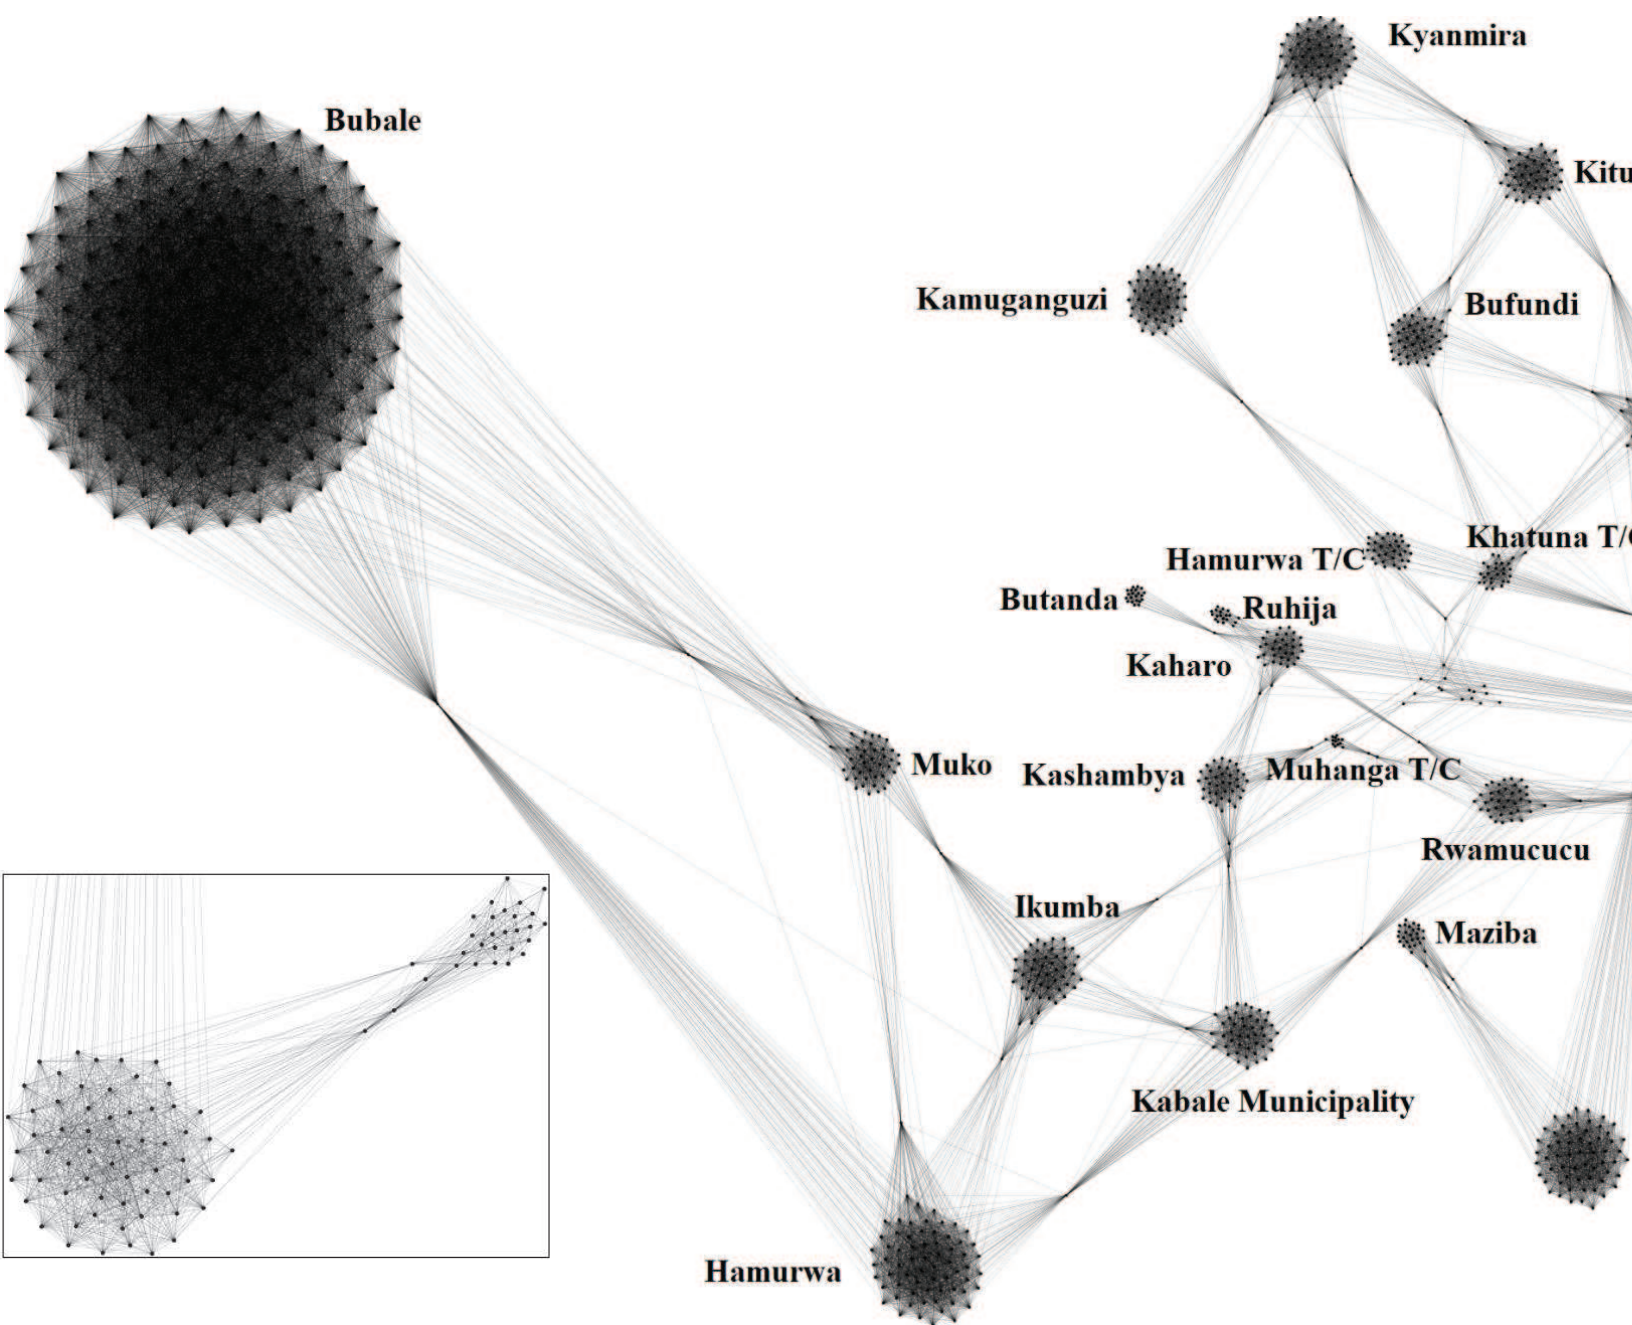



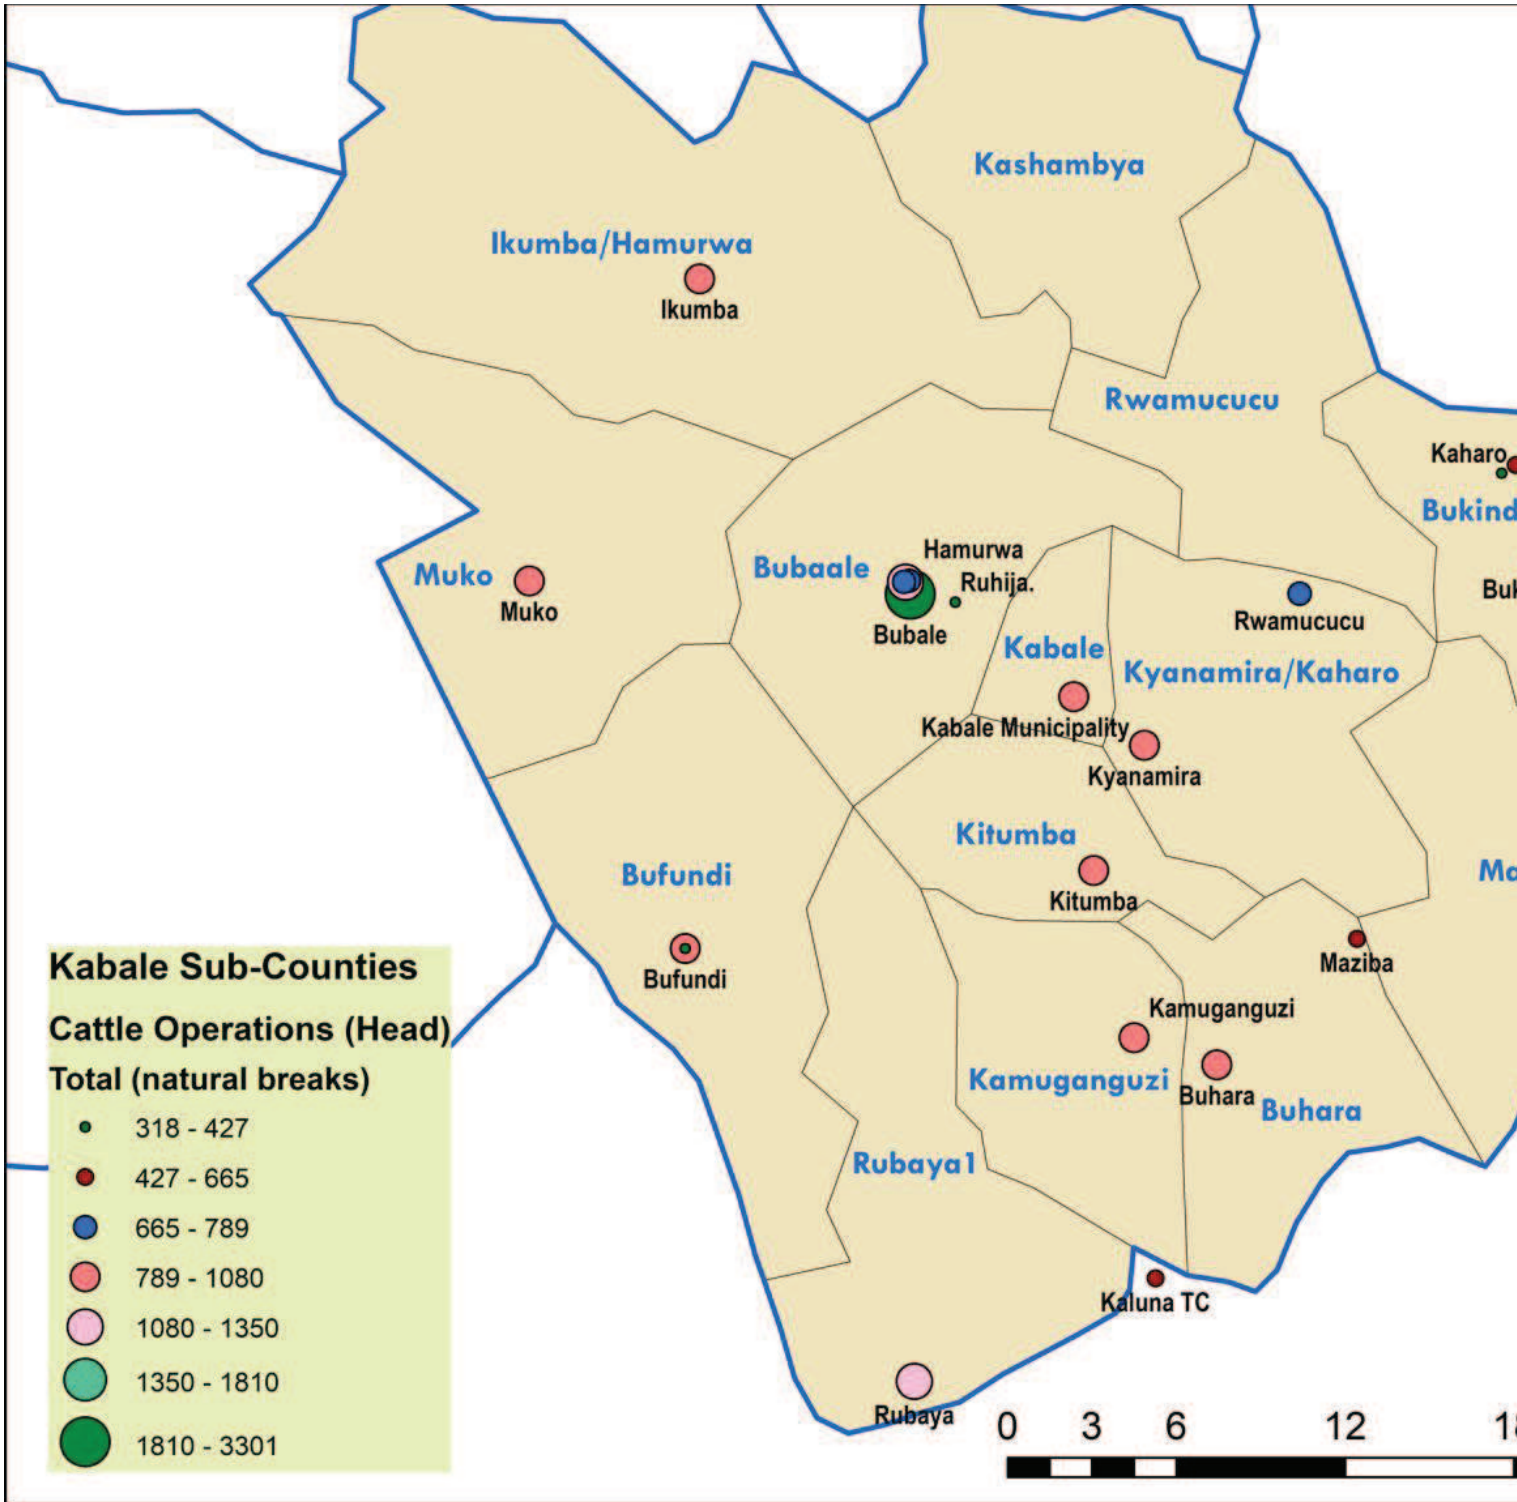

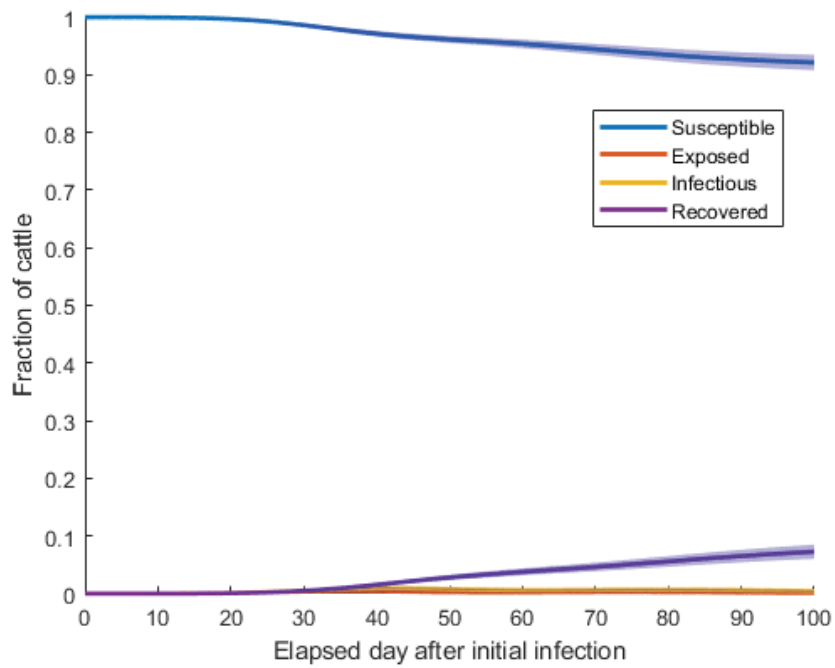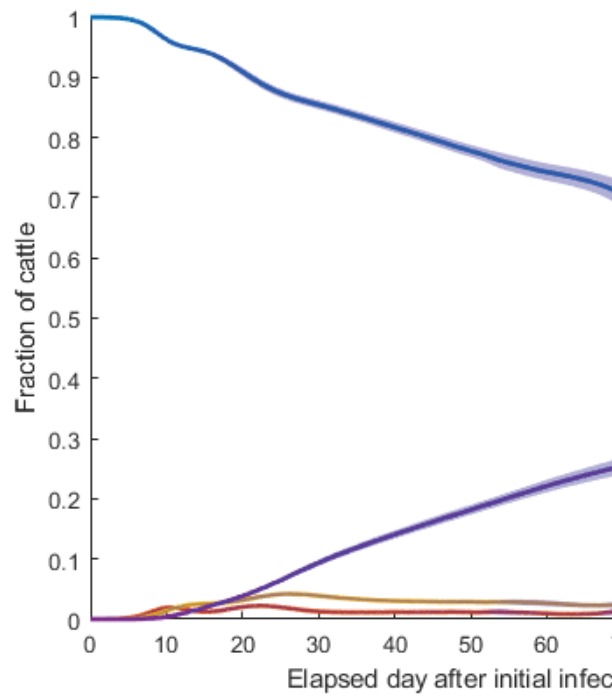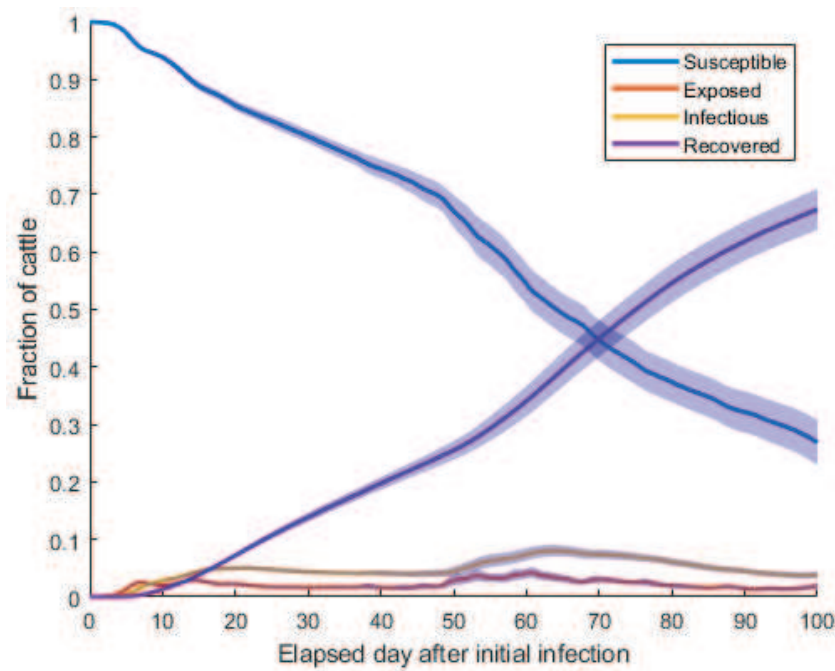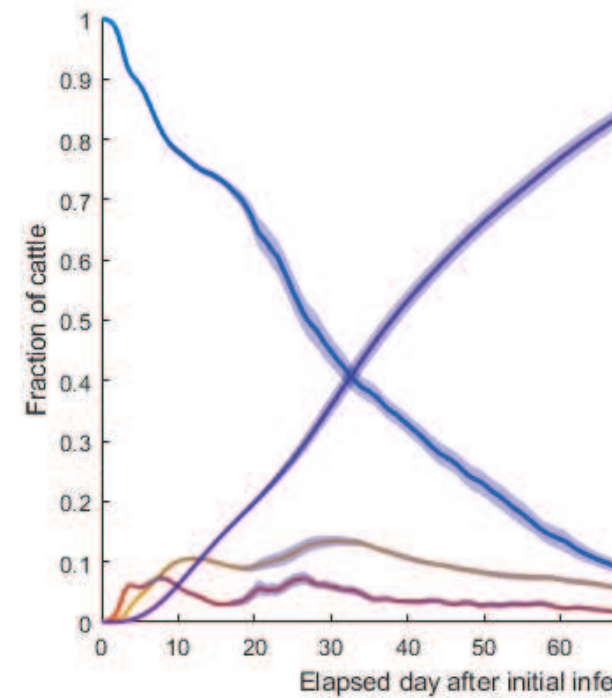

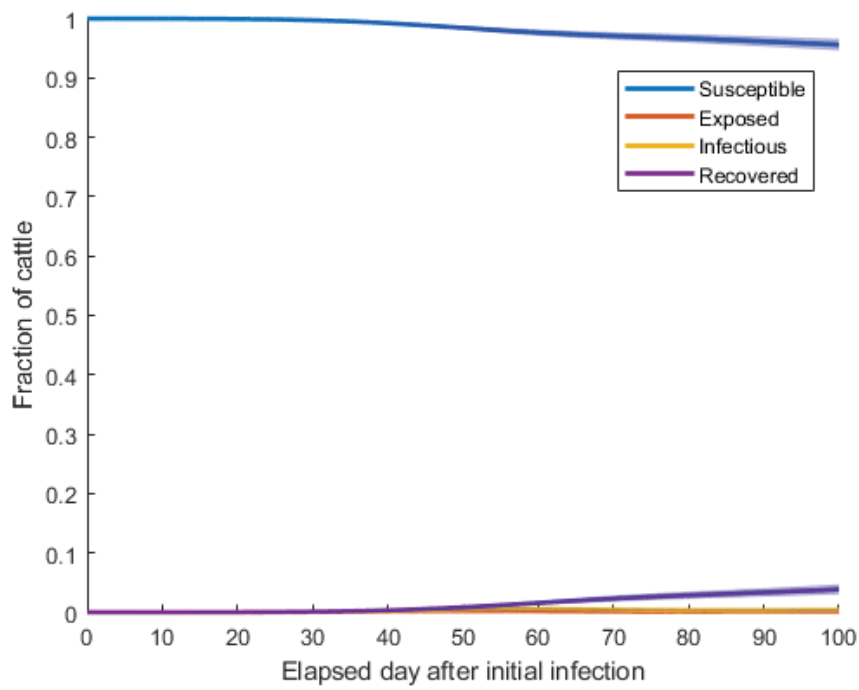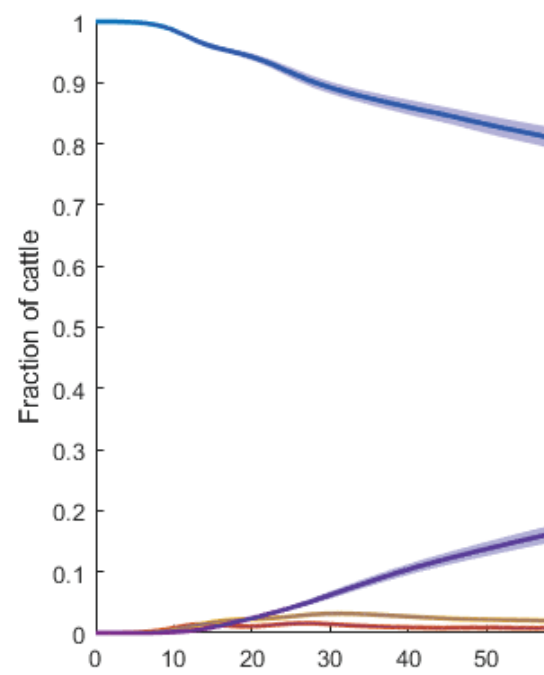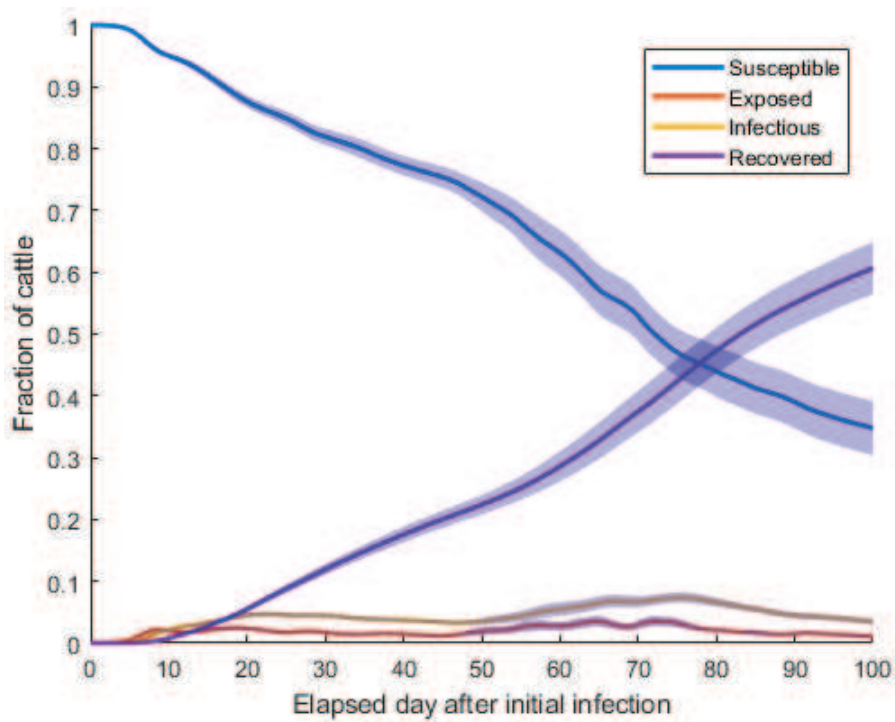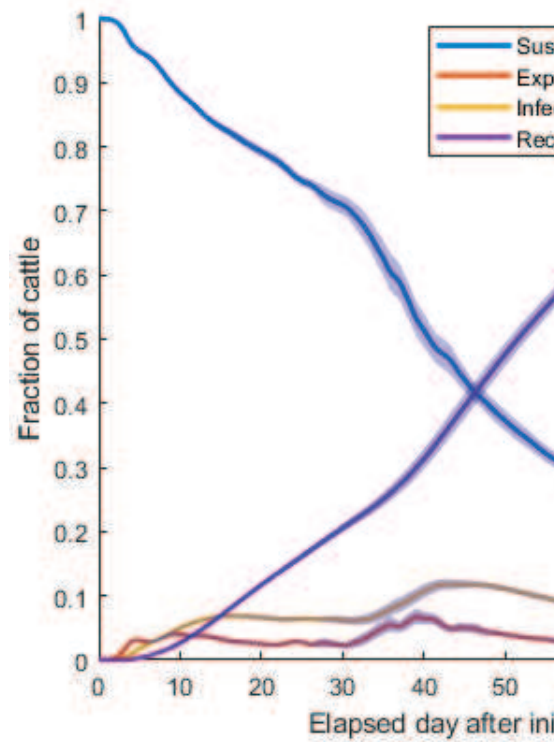

Source: https://www.biorxiv.org/content/10.1101/388785v1.full.pdf
